# Supplementary material for: Integrated bulk and single-cell RNA sequencing identifies an aneuploidy-based gene signature to predict sensitivity of lung adenocarcinoma to traditional chemotherapy drugs and patients’ prognosis
Source: PeerJ journal article supplement (doi:10.7717/peerj.17545), 2024-06-24

# TCGA dataset

## Univariate analysis

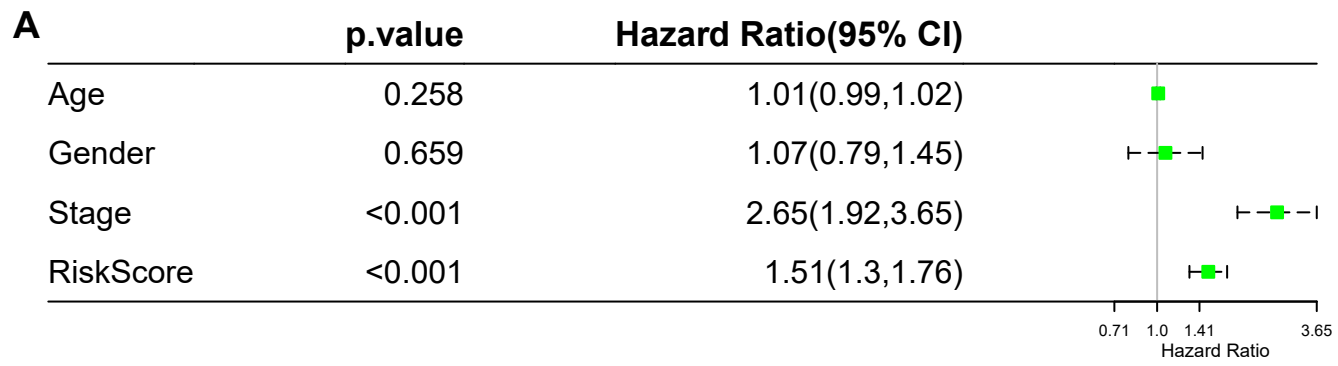

## Multivariate analysis

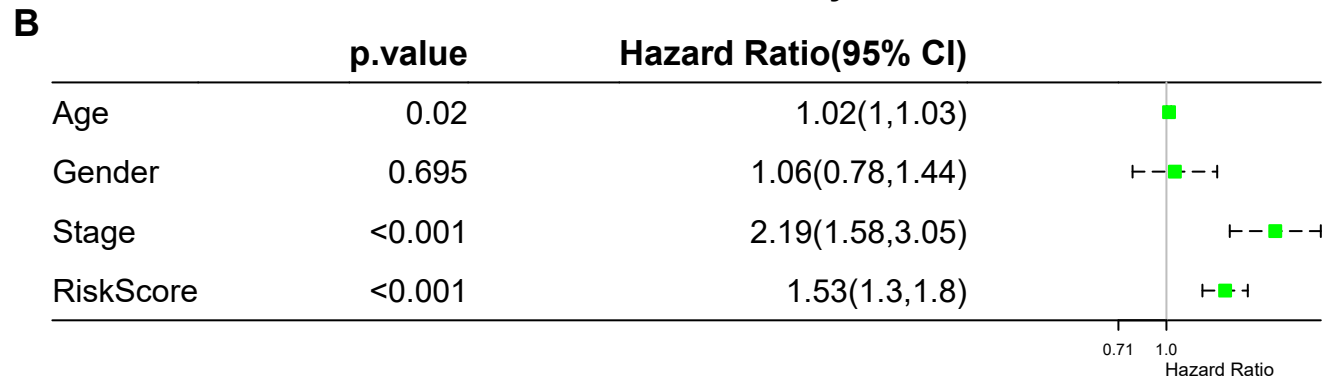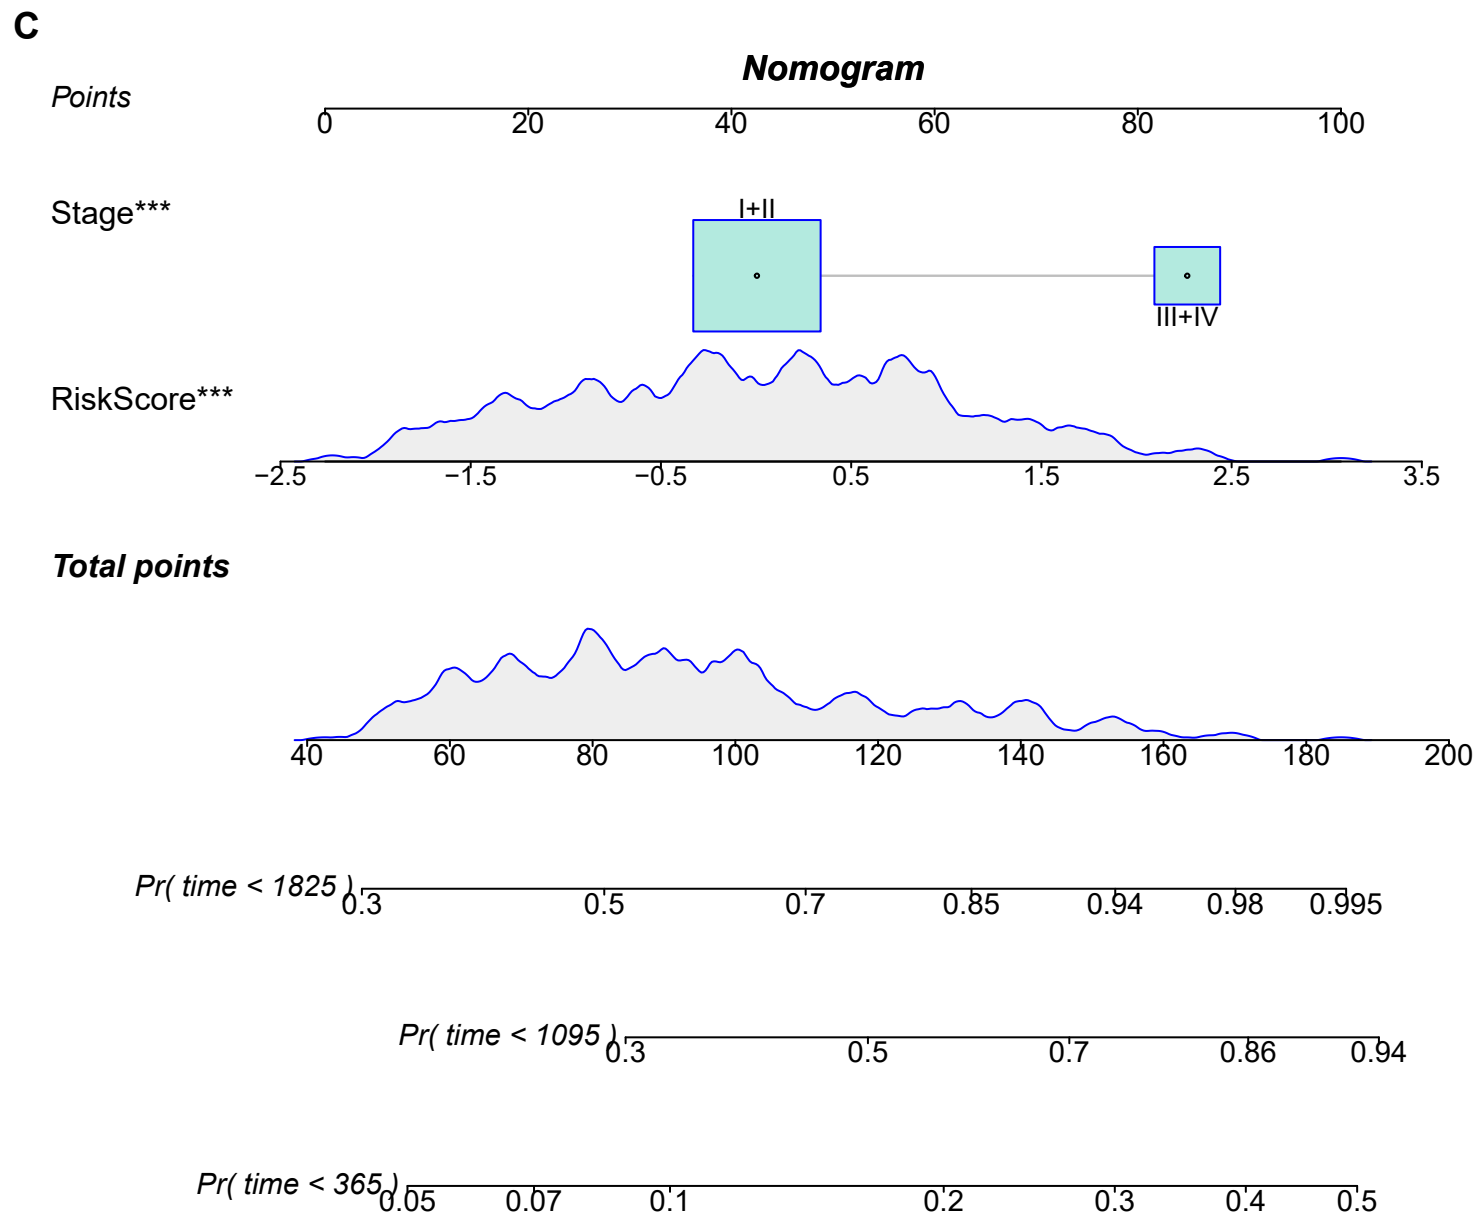

# GSE30219 dataset

## Univariate analysis

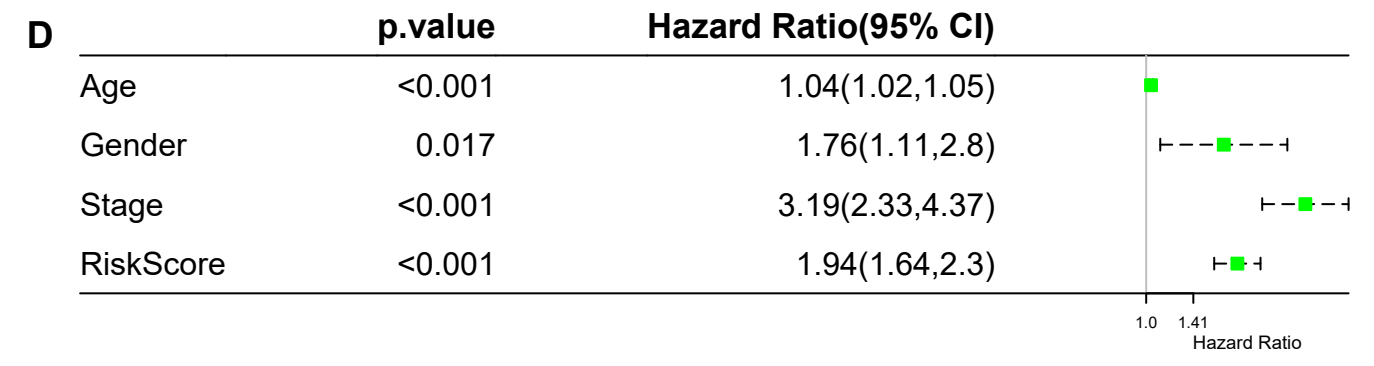

## Multivariate analysis

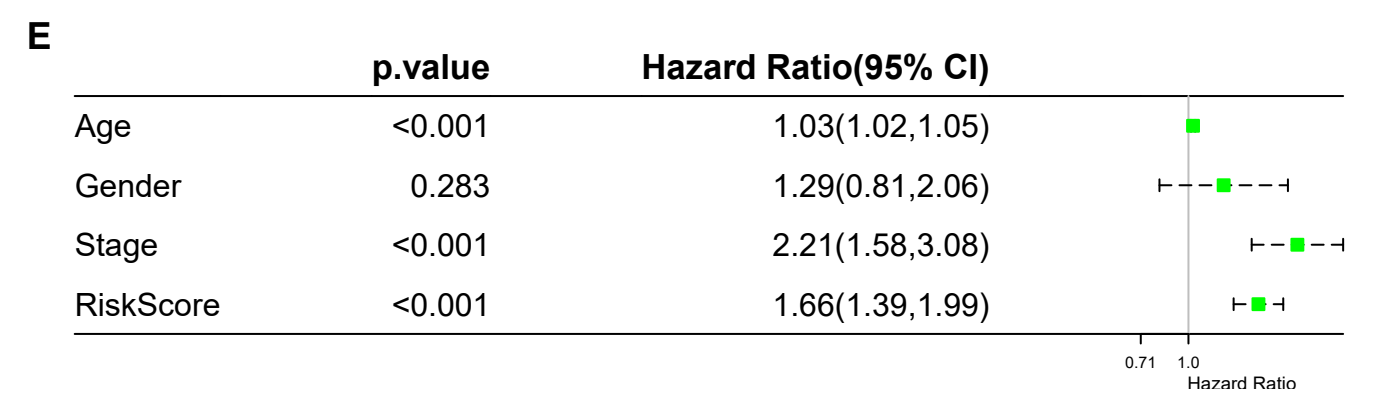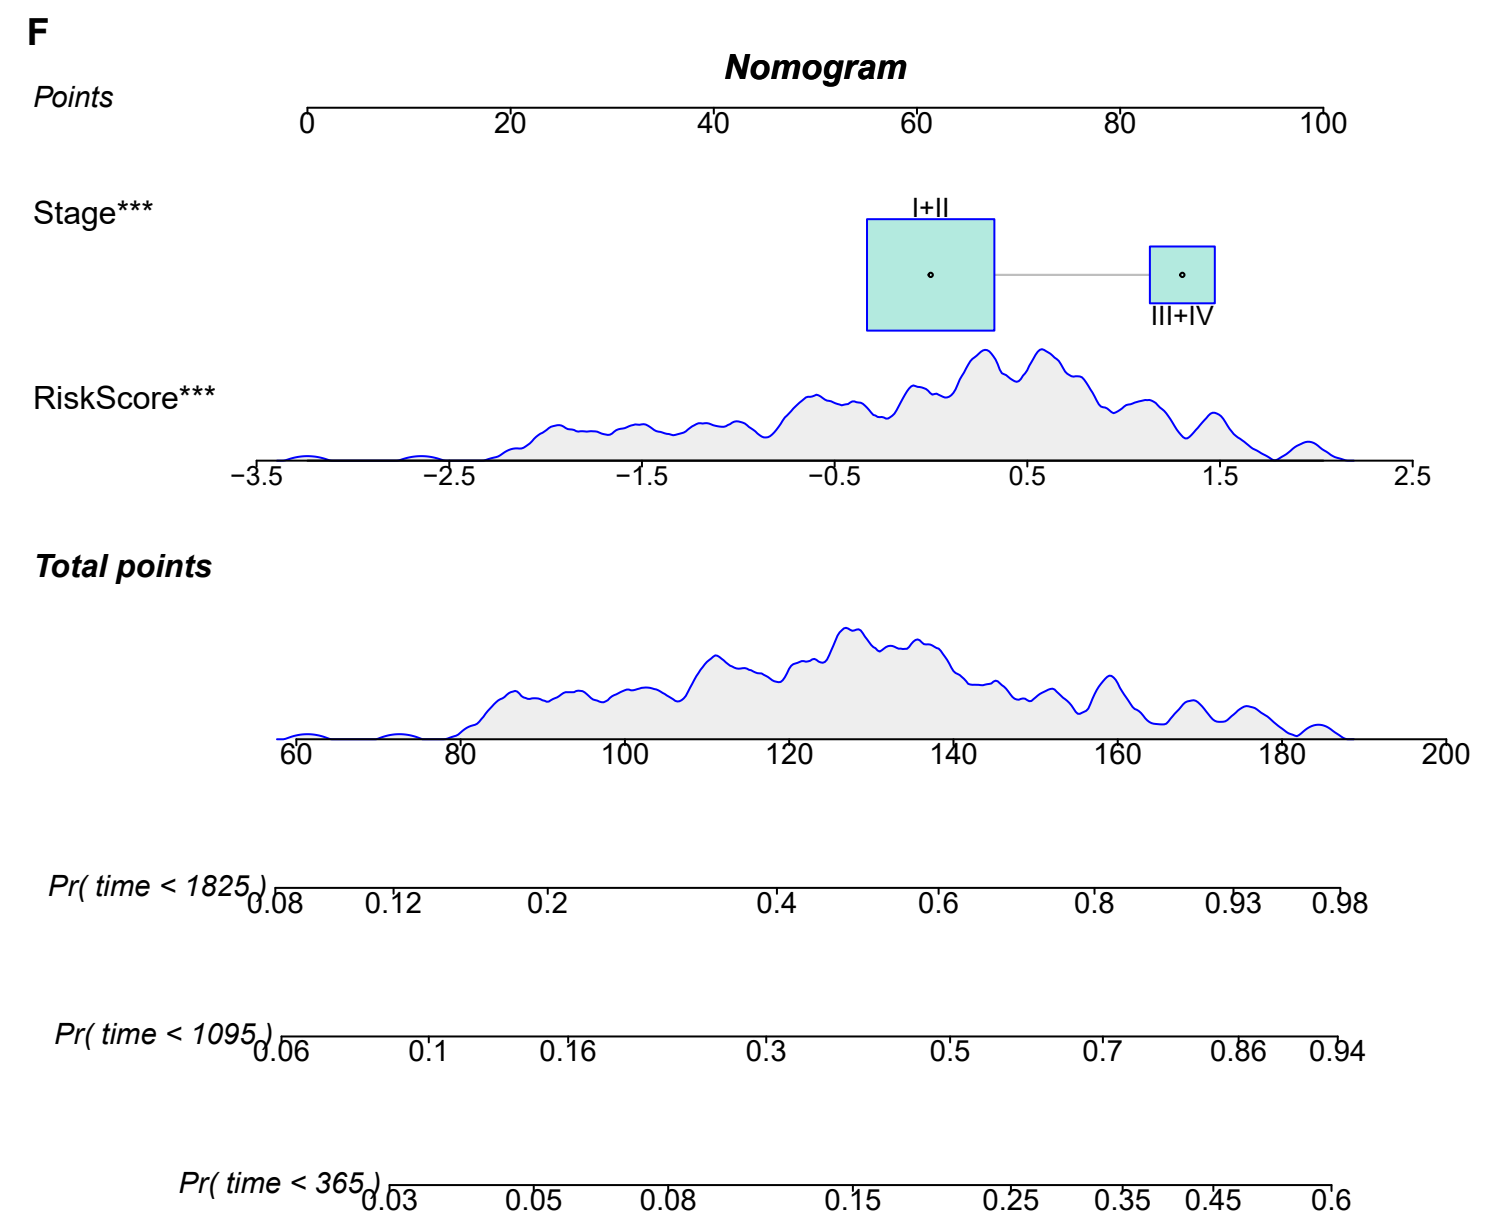

Supplement: FigureS1.pdf [file FigureS1.pdf]
