# Supplementary material for: Integrated bulk and single-cell RNA sequencing identifies an aneuploidy-based gene signature to predict sensitivity of lung adenocarcinoma to traditional chemotherapy drugs and patients’ prognosis
Source: PeerJ journal article supplement (doi:10.7717/peerj.17545), 2024-06-24
Supplement: MIQE_checklist.xls [file MIQE_checklist.xls]

## Sheet: Sheet1
ITEM TO CHECK	IMPORTANCE	CHECKLIST
EXPERIMENTAL DESIGN
Definition of experimental and control groups	E	line9page186-193
Number within each group	E	line9page186-193
Assay carried out by core lab or investigator's lab?	D	NA
Acknowledgement of authors' contributions	D	NA
SAMPLE
Description	E	line9-10page185-206
Volume/mass of sample processed	D	NA
Microdissection or macrodissection	E	line9-10page185-206
Processing procedure	E	line9-10page185-206
If frozen - how and how quickly?	E	line9-10page185-206
If fixed - with what, how quickly?	E	line9-10page185-206
Sample storage conditions and duration (especially for FFPE samples)	E	line9-10page185-206
NUCLEIC ACID EXTRACTION
Procedure and/or instrumentation	E	line9-10page185-206
Name of kit and details of any modifications	E	line9-10page185-206
Source of additional reagents used	D	NA
Details of DNase or RNAse treatment	E	line9-10page185-206
Contamination assessment (DNA or RNA)	E	line9-10page185-206
Nucleic acid quantification	E	line9-10page185-206
Instrument and method	E	line9-10page185-206
Purity (A260/A280)	D	NA
Yield	D	NA
RNA integrity method/instrument	E	line9-10page185-206
RIN/RQI or Cq of 3' and 5' transcripts	E	line9-10page185-206
Electrophoresis traces	D	NA
Inhibition testing (Cq dilutions, spike or other)	E	line9-10page185-206
REVERSE TRANSCRIPTION
Complete reaction conditions	E	line9-10page185-206
Amount of RNA and reaction volume	E	line9-10page185-206
Priming oligonucleotide (if using GSP) and concentration	E	line9-10page185-206
Reverse transcriptase and concentration	E	line9-10page185-206
Temperature and time	E	line9-10page185-206
Manufacturer of reagents and catalogue numbers	D	NA
Cqs with and without RT	D*	NA
Storage conditions of cDNA	D	NA
qPCR TARGET INFORMATION
If multiplex, efficiency and LOD of each assay.	E	line9-10page185-206
Sequence accession number	E	line9-10page185-206
Location of amplicon	D	NA
Amplicon length	E	line9-10page185-206
In silico specificity screen (BLAST, etc)	E	line9-10page185-206
Pseudogenes, retropseudogenes or other homologs?	D	NA
Sequence alignment	D	NA
Secondary structure analysis of amplicon	D	NA
Location of each primer by exon or intron (if applicable)	E	line9-10page185-206
What splice variants are targeted?	E	line9-10page185-206
qPCR OLIGONUCLEOTIDES
Primer sequences	E	line9-10page185-206
RTPrimerDB Identification Number	D	NA
Probe sequences	D**	NA
Location and identity of any modifications	E	line9-10page185-206
Manufacturer of oligonucleotides	D	NA
Purification method	D	NA
qPCR PROTOCOL
Complete reaction conditions	E	line9-10page185-206
Reaction volume and amount of cDNA/DNA	E	line9-10page185-206
Primer, (probe), Mg++ and dNTP concentrations	E	line9-10page185-206
Polymerase identity and concentration	E	line9-10page185-206
Buffer/kit identity and manufacturer	E	line9-10page185-206
Exact chemical constitution of the buffer	D	NA
Additives (SYBR Green I, DMSO, etc.)	E	line9-10page185-206
Manufacturer of plates/tubes and catalog number	D	NA
Complete thermocycling parameters	E	line9-10page185-206
Reaction setup (manual/robotic)	D	NA
Manufacturer of qPCR instrument	E	line9-10page185-206
qPCR VALIDATION
Evidence of optimisation (from gradients)	D	NA
Specificity (gel, sequence, melt, or digest)	E	line9-10page185-206
For SYBR Green I, Cq of the NTC	E	line9-10page185-206
Standard curves with slope and y-intercept	E	line9-10page185-206
PCR efficiency calculated from slope	E	line9-10page185-206
Confidence interval for PCR efficiency or standard error	D	NA
r2 of standard curve	E	line9-10page185-206
Linear dynamic range	E	line9-10page185-206
Cq variation at lower limit	E	line9-10page185-206
Confidence intervals throughout range	D	NA
Evidence for limit of detection	E	line9-10page185-206
If multiplex, efficiency and LOD of each assay.	E	line9-10page185-206
DATA ANALYSIS
qPCR analysis program (source, version)	E	line9-10page185-206
Cq method determination	E	line9-10page185-206
Outlier identification and disposition	E	line9-10page185-206
Results of NTCs	E	line9-10page185-206
Justification of number and choice of reference genes	E	line9-10page185-206
Description of normalisation method	E	line9-10page185-206
Number and concordance of biological replicates	D	NA
Number and stage (RT or qPCR) of technical replicates	E	line9-10page185-206
Repeatability (intra-assay variation)	E	line9-10page185-206
Reproducibility (inter-assay variation, %CV)	D	NA
Power analysis	D	NA
Statistical methods for result significance	E	line9-10page185-206
Software (source, version)	E	line9-10page185-206
Cq or raw data submission using RDML	D	NA
Table 1. MIQE checklist for authors, reviewers and editors. All essential information (E) must be submitted with the manuscript. Desirable
information (D) should be submitted if available. If using primers obtained from RTPrimerDB, information on qPCR target, oligonucleotides,
protocols and validation is available from that source.
*: Assessing the absence of DNA using a no RT assay is essential when first extracting RNA. Once the sample has been validated as
RDNA-free, inclusion of a no-RT control is desirable, but no longer essential.
**: Disclosure of the probe sequence is highly desirable and strongly encouraged. However, since not all commercial pre-designed assay
vendors provide this information, it cannot be an essential requirement. Use of such assays is advised against.
