# Supplementary material for: Integrated bulk and single-cell RNA sequencing identifies an aneuploidy-based gene signature to predict sensitivity of lung adenocarcinoma to traditional chemotherapy drugs and patients’ prognosis
Source: PeerJ journal article supplement (doi:10.7717/peerj.17545), 2024-06-24
Supplement: TableS1.xlsx [file TableS1.xlsx]

## Sheet: Sheet1
Supplementary table 1. Raw data concerning TAGA-LUAD sample aneuploidy scores from literature (PMID: 29622463)
Sample	Type	AneuploidyScore(AS)	AS_del	AS_amp	Genome_doublings	Leuk	Purity	Stroma	Stroma_notLeukocyte	Stroma_notLeukocyte_Floor	SilentMutationspeMb	Non-silentMutationsperMb	1p	1q	2p	2q	3p	3q	4p	4q	5p	5q	6p	6q	7p	7q	8p	8q	9p	9q	10p	10q	11p	11q	12p	12q	13q	14q	15q	16p	16q	17p	17q	18p	18q	19p	19q	20p	20q
TCGA-05-4244-01	LUAD	17	8	9	1	0.246926	0.44	0.56	0.313074	0.313074	1.37422	5.21058	0	1	1	0		0	0	-1	1	1		-1	1	0	-1	1		-1	0		0		0	0	-1	0	-1	1		-1	1	0	0	0	0	0
TCGA-05-4249-01	LUAD	24	17	7	1	0.251681	0.49	0.51	0.258319	0.258319	1.94994	8.17255	-1	1	0	0	-1	-1	-1	-1	-1	-1	1	1	-1	-1	-1		-1	-1	0	0	0	0		0	0	0	-1	1	1	-1	1	-1	-1	0	0	1
TCGA-05-4250-01	LUAD	17	7	10	1	0.238785	0.5	0.5	0.261215	0.261215	2.71942	8.53039	-1	1	1	1	0		0	0	0	0	0		1	1	1	1	-1	-1	0	0	0	0		0	-1	0	0	0	0		1	-1	-1	-1		1	1
TCGA-05-4382-01	LUAD	22	11	11	1	0.460245	0.21	0.79	0.329755	0.329755	11.6187	43.3918	0	1	1	1	-1	1		-1		-1	1	-1	1	0	0	-1		-1	0	0	-1		1		1	0	-1		-1		1	1	1			0	0
TCGA-05-4384-01	LUAD	1	0	1	0	0.199447	0.49	0.51	0.310553	0.310553	1.16527	3.25677	0	1	0	0	0	0	0	0	0	0	0	0		0	0	0		0	0	0	0	0	0	0	0	0	0	0	0	0	0	0	0		0	0	0
TCGA-05-4389-01	LUAD	20	7	13	1	0.336176	0.48	0.52	0.183824	0.183824	2.04144	5.7941		1	1	0	-1			-1	1	-1				0	-1	1		0	1	1	0		1	1		1		0	0	-1	1	1		-1		1	1
TCGA-05-4390-01	LUAD	21	16	5	1	0.189849	0.57	0.43	0.240151	0.240151	4.35856	14.6388	-1		0		-1	-1	0		0		0	-1	1	0	-1	1	0	-1	0		-1	-1		0	-1	1	-1	1	-1	-1	-1		1	-1	0	0
TCGA-05-4395-01	LUAD	25	14	11	1	0.202137	0.61	0.39	0.187863	0.187863	2.38271	6.72589	0	1	1	1		0	1	-1	1	0	-1	-1	1		-1		-1	0		0	0	0	1	1	-1			1	1	-1	1	-1	-1	-1	-1	-1	0
TCGA-05-4396-01	LUAD	11	10	1	0	0.118303	0.82	0.18	0.061697	0.061697	1.79594	7.06201	-1	0	0	0	0	0	0	0	1		0	0	0	0	0	0	-1	0	0	0	0	0	0	0	0	-1	0	-1	0	-1	-1		0	-1	-1	0	0
TCGA-05-4397-01	LUAD	7	5	2	0	0.144997	0.87	0.13	-0.0149971	0	5.6948	21.3114	0	1	0	0	-1	1	-1	0	0		0	0	0	0	0	0	0	0	0	-1	0	0		0		0		0	0	-1		0	0		-1	0
TCGA-05-4398-01	LUAD	23	18	5	2	0.286318	0.33	0.67	0.383682	0.383682	6.38211	18.7308	-1	0	0		0	0	-1	-1	1	-1	0	0	1	1	-1	1	0	0	-1	-1	-1			0	-1	-1	-1		-1		1	-1	-1	-1	-1	-1	0
TCGA-05-4402-01	LUAD	31	15	16	1	0.285064	0.44	0.56	0.274936	0.274936	1.05081	3.06486	1	1	1	1	0	0	0	0	-1	-1	1	1	1	1	-1		-1	-1	-1	-1	1	1	1	1	-1	1	-1	0	-1	-1	1	1	-1	-1	-1	1	0
TCGA-05-4403-01	LUAD	1	0	1	0	0.255516	0.46	0.54	0.284484	0.284484	1.14216	3.48504	0	0	0	0	0	0	0	0	0	0	0	0	0	0	0	0	0	0	0	0	0	0	0	0	0	0	1	0	0	0	0	0	0	0	0	0	0
TCGA-05-4405-01	LUAD	24	10	14	1	0.304389	0.38	0.62	0.315611	0.315611	3.19876	9.74036	0	1	0		0	0	-1	-1	1	-1	0	-1	1	1	1	1	-1	1	1	0	0	0	-1	0	-1			1	-1	1	1	0	-1	1	1	0	-1
TCGA-05-4410-01	LUAD	18	6	12	2	0.428618	0.24	0.76	0.331382	0.331382	8.58249	28.0615	0	1	0	1	1	1		0	1	-1	1		1	1	-1		1	0	1	-1		1	0	0	0	0	-1	0	0	-1	1	0		-1
TCGA-05-4415-01	LUAD	20	17	3	1	0.176539	0.67	0.33	0.153461	0.153461	1.62397	5.16191	-1	1	0	0	-1	-1	-1	-1	0	0	-1	-1	1	-1	0	-1	-1	-1	0	0			1	0		0	0	-1	-1		0		0	-1	0	-1	-1
TCGA-05-4417-01	LUAD	19	13	6	1	0.355197	0.4	0.6	0.244803	0.244803	2.09508	7.40655	-1	1	0		-1	-1		0	0	-1		0	1	-1	1	1	0	0	0	0	0		1		-1		-1	0	0	-1	0	-1	-1	0	0	1	-1
TCGA-05-4418-01	LUAD	6	4	2	0	0.437817	0.55	0.45	0.0121831	0.0121831	2.08654	6.91539	0	0	0	0	0	0	0	0	0	0	0	0	0	0	0	0	-1	-1	0		0	0	1	1	0	0	0	0	0	0	0	0	0	-1	0	0
TCGA-05-4420-01	LUAD	22	7	15	1	0.204151	0.59	0.41	0.205849	0.205849	2.33553	7.2431	1	0	1	0		1	-1		1	-1	1	-1	1	1	-1	1	0	0	1	0	1	1	1	1	0				-1	-1		1	1			0
TCGA-05-4422-01	LUAD	7	4	3	0	0.32198	0.62	0.38	0.0580204	0.0580204	0.443913	1.0358	-1		0	0	0	0	0	0	1	0	0	0	0	0	0		0	0	1	1	0		0	0	0	0	0	0	0	0	0	0	-1	-1
TCGA-05-4424-01	LUAD	19	6	13	2	0.3262	0.24	0.76	0.4338	0.4338	5.33619	18.3248		1	1		1	1	0	0	1	-1		0	0	0	1	1	0		1	-1	0	0	0		-1	1	-1		0	0	1	1	-1		1	1
TCGA-05-4425-01	LUAD	10	6	4	0	0.228394	0.61	0.39	0.161606	0.161606	0.382437	1.02964	0	0	0	0	0	0	0	0	0	0	0	-1	0	0	-1	1	0	0	0	0	1	1		0	-1	0	0	0	0	-1	1	-1	-1	0	0	0	0
TCGA-05-4426-01	LUAD	4	3	1	0	0.226346	0.7	0.3	0.0736543	0.0736543	0.177638	1.30268	0	0	0	0	0	0	0	0	1	0	0		0	0	0	0	0	0	0	0	0	0	0	0		0	0	0	0	-1	0	-1	-1	0	0	0	0
TCGA-05-4427-01	LUAD	20	14	6	2	0.196915	0.47	0.53	0.333085	0.333085	7.1402	26.4069		-1	-1		1	1	0		0	-1	0	0	-1		-1	0	1	1	1	0	-1	-1		0	-1		0	-1	-1	-1	1		-1	-1	0	0
TCGA-05-4430-01	LUAD	20	6	14	1	0.295727	0.2	0.8	0.504273	0.504273	2.11668	7.05561	0	1	0				0	0	1	-1	1	-1	1	1	0	0	1	1	1		0	0	0	1	-1	0	-1	1	1	-1	1	1	0	0	0	1
TCGA-05-4432-01	LUAD	21	8	13	1	0.346039	0.36	0.64	0.293961	0.293961	5.03856	14.4933	0	1	1	1	-1	0	1		-1	-1	0		0	0	1	1		-1	1	1				1	-1	0	-1	0	-1	1	1	0	0		1		1
TCGA-05-4433-01	LUAD	6	6	0	0	0.280133	0.62	0.38	0.0998673	0.0998673	0.291757	0.875271		0	0	0	0	0	0	0	0	0	0	0	0	0	-1	0	-1	0	0	0	0	-1			0	0	0	0	0	-1	0	0	-1	-1	0	0	0
TCGA-05-4434-01	LUAD	2	2	0	0	0.38452	0.45	0.55	0.16548	0.16548	0.437423	1.10814		0	0	0	-1	0	0	0	0	0	0		0	0	0		0	0	0	0	-1	0	0		0	0	0	0	0	0	0	0	0	0		0	0
TCGA-05-5423-01	LUAD	15	3	12	1	0.219622	0.59	0.41	0.190378	0.190378	0.989849	4.20686	0	1	0	0	0	0	1	0	1	1	0	0	1	1	0		-1	0	0	0	1	1	0	0	-1	0	0	1	1	0	0	0		0	0	-1	1
TCGA-05-5425-01	LUAD	2	0	2	0	0.381745	0.71	0.29	-0.0917448	0	4.48052	15.3443	0	0	0	0	0	0	0	0	0	0	1	0	0	0	0	0	0	0	0	0	0	0		0	0	0	0	0	0	0	0	0	0	0	0	1
TCGA-05-5428-01	LUAD	20	10	10	1	0.196731	0.63	0.37	0.173269	0.173269	3.12807	10.0656		1		1	1		0		1	-1		-1	1	1	-1	1	0	-1	0	0	-1	0	0		1	0	-1		-1	-1	0	1		-1	0	-1
TCGA-05-5429-01	LUAD	8	4	4	0	0.140228	0.82	0.18	0.0397718	0.0397718	0.311606	0.997139		1	0	0	0	1	0	0	0	0	0	-1	0	0	0	0	-1	0	0		1	1	0	0	0	0	0	0	0	-1	0	0	-1	0	0	0	0
TCGA-05-5715-01	LUAD	10	9	1	0	0.147922	0.73	0.27	0.122078	0.122078	1.06513	2.9761		1	0	0	-1	-1	0	0		-1	0	0	0	0	0	0	-1	-1	-1	-1	0	0	0	0	0	0	0	0	0			-1	-1	0	0	0
TCGA-35-3615-01	LUAD	5	1	4	0	0.184525	0.69	0.31	0.125475	0.125475	0.788455	2.75959	0	1	0	0	0	0	0	0	1	1	1	-1	0	0	0	0	0	0	0	0	0	0	0		0	0	0	0	0	0	0	0	0	0	0		0
TCGA-35-4122-01	LUAD	23	12	11	1	0.435623	0.21	0.79	0.354377	0.354377	2.37286	8.0735	0	0	1		0	0	0	0	0	0	1	1				1	-1	-1	1	1	0	-1	1	1	-1		-1	-1	-1	-1		1	-1	-1		1	1
TCGA-35-4123-01	LUAD	14	9	5	0	0.514542	0.4	0.6	0.0854582	0.0854582	2.60207	6.50518			1		0	0	0	0	1	-1	0	-1	1	1	-1		0	0	0	0	0	0	0	0	-1	1	-1		-1	-1	0	0	0	-1	0	0	0
TCGA-35-5375-01	LUAD	26	17	9	2	0.193749	0.58	0.42	0.226251	0.226251	3.05003	11.6341	-1			0	-1	1	-1	-1	1		1	0	-1	1		1	0	-1	-1	-1		-1	0	0	-1	1	-1		-1		0	-1	-1	-1	1	1	1
TCGA-38-4625-01	LUAD	16	11	5	1	0.312425	0.35	0.65	0.337575	0.337575	4.48009	15.0985		1	0	-1	0	0	-1		0	-1	0		0	1	-1	1	0	-1		0		-1		0	-1		-1		-1	-1	0	-1	0				1
TCGA-38-4626-01	LUAD	2	0	2	0	0.44158	0.28	0.72	0.27842	0.27842	1.94733	6.22555	0	1	0	0	0	0	0	0	1	0	0	0	0	0	0	0	0	0	0	0	0	0	0	0	0	0	0	0	0	0	0	0	0	0	0	0	0
TCGA-38-4627-01	LUAD	9	5	4	0	0.336047	0.22	0.78	0.443953	0.443953	0.144492	0.809157	0	0	0	0	-1	0	0	0	1	0	0	0	0	0		0	-1	-1	0	0	0	0	0	0	0	1	0	1	1	0	0	-1	-1	0	0	0	0
TCGA-38-4628-01	LUAD	24	14	10	2	0.152455	0.5	0.5	0.347545	0.347545	0.919117	3.05384		1	0	0	-1	0	1		1	-1		1	1		-1	1	-1	-1	-1	-1		-1			-1	-1		1	-1	1	1		-1	-1
TCGA-38-4631-01	LUAD	20	12	8	1	0.310961	0.49	0.51	0.199039	0.199039	5.86081	19.617	0	0	0		0	1	1	0	1	-1	-1	0	1		-1		-1	-1			0	-1	0	1	1	-1		0	-1	-1	0	0	-1	-1	1	0	0
TCGA-38-4632-01	LUAD	23	15	8	1	0.314435	0.37	0.63	0.315565	0.315565	3.60897	13.89		1	1	0		-1		0	1	-1	0	-1	1	1		1	-1	-1	1	0	-1	-1	1	-1	-1	-1	-1	0	0	-1	0	-1	-1	-1		0	0
TCGA-38-6178-01	LUAD	22	14	8	2	0.309406	0.32	0.68	0.370594	0.370594	0.707632	1.7537		1		0	-1	0		-1		1	1	-1	1	1		1	-1			0	0	0	-1	-1	-1	0	-1	1		-1	-1	0	-1	-1	-1		0
TCGA-38-7271-01	LUAD	2	0	2	0	0.556715	0.26	0.74	0.183285	0.183285	0.572371	2.06689	0	1	0	0	0	0	0	0	1		0	0	0	0	0	0	0	0	0	0	0	0	0	0	0	0	0	0	0	0	0	0	0	0	0	0	0
TCGA-38-A44F-01	LUAD	1	0	1	0	0.399931	0.26	0.74	0.340069	0.340069	0.206034	0.323768	0	0	0	0	0	0	0	0	0	0	0	0	0	0	0	0	0	0	0	0	0	0	1	0	0	0	0	0	0	0	0	0	0	0	0	0	0
TCGA-44-2655-01	LUAD	4	2	2	0	0.394397	0.33	0.67	0.275603	0.275603	1.48448	4.59897	0	1	0	0	0	0	0	0	0	0	0	0	0	0	0	0		0	0	0	0	0	0	0	1	0	0	0	0	0	0	0	0	-1	-1	0	0
TCGA-44-2656-01	LUAD	19	12	7	1	0.414306	0.32	0.68	0.265694	0.265694	6.40639	20.8567	0	1	0		-1		1	1	1			-1	1	1	-1	1	0	0		0	0		-1		-1	0	-1		-1	-1		0	0	-1	-1	-1
TCGA-44-2657-01	LUAD	10	10	0	0	0.523987	0.34	0.66	0.136013	0.136013	3.09799	9.82908		-1		0	0	0	0	0			0	0	0	0	-1		-1	-1	-1	-1	0	0		-1	0	0	-1	0	0	-1			-1			0	0
TCGA-44-2659-01	LUAD	25	22	3	1	#N/A	#N/A	#N/A	#N/A	#N/A	2.72477	10.7306	0	0	-1	-1	-1	-1	-1	0	1		1	-1	1	0	-1	-1	-1	-1	-1	-1	0	0	-1	-1	0		-1	0	0	-1		0	0	-1	-1	-1	-1
TCGA-44-2662-01	LUAD	24	11	13	1	0.535849	0.26	0.74	0.204151	0.204151	1.83849	5.12999		1		0		1	1	1		1	0		1	1	-1	0	-1	-1	-1	-1	-1	1		0		-1		1	0	-1	1	1	-1			-1	1
TCGA-44-2665-01	LUAD	7	3	4	0	0.213836	0.43	0.57	0.356164	0.356164	0.501319	0.94366		1	-1	0	0	0	0	0		1	0	0	0	0	0			0	0	0	0	0	0	0	0	0	0	1	1	-1	0		-1	0			0
TCGA-44-2666-01	LUAD	2	2	0	0	0.202895	0.56	0.44	0.237105	0.237105	0.0866423	0.895304	0	0	0	0	0	0	0	0	0	0	0	-1	0	0	0	0	0	0	0	0	0	0	-1	0	0	0	0	0	0	0	0	0	0	0	0	0	0
TCGA-44-2668-01	LUAD	11	5	6	0	0.461565	0.3	0.7	0.238435	0.238435	3.04592	9.16733	0	1	0		-1	1	0	0	1	0	0		0	0	-1	1	-1	0	0	0	0	0	1		0	1		0	0	-1		0		0		-1	0
TCGA-44-3396-01	LUAD	6	2	4	0	0.565021	0.24	0.76	0.194979	0.194979	1.56109	4.96712	0	0	0	0	0	0	0	0	0	0	0	0	1	1	0		0	0	1	-1	0	0		0	0	0	0	0	0	-1	1	0	0	0	0	0	0
TCGA-44-3398-01	LUAD	2	0	2	0	0.345959	0.19	0.81	0.464041	0.464041	1.47161	4.41482	0	0	0	0	0	0	0	0	1	1	0	0	0	0	0	0	0	0		0	0	0	0	0	0		0	0	0	0	0	0	0	0	0	0	0
TCGA-44-3917-01	LUAD	19	13	6	1	0.403952	0.38	0.62	0.216048	0.216048	1.73555	5.69382	1	1	0	0	-1	-1	0		-1	-1		-1	1		-1	1	-1	-1				0		0	-1	1		-1	0	-1	0	0			-1		1
TCGA-44-3918-01	LUAD	12	10	2	0	0.372101	0.45	0.55	0.177899	0.177899	6.59779	24.7343		0		0			0	-1	0	0	0	-1	0	0	-1	1	1	-1	0	-1	0	-1			0		-1		-1					-1	-1	0
TCGA-44-3919-01	LUAD	6	4	2	0	0.33971	0.51	0.49	0.15029	0.15029	0.334584	1.03163	0	0	0	0	0	0	0	0	1		0	0	0	0	-1	0	0	0	0	0	0	0	0	0		0	-1	0	-1	-1	1	0	0	0	0
TCGA-44-4112-01	LUAD	6	2	4	0	0.213551	0.57	0.43	0.216449	0.216449	3.75062	12.0078	0		0	0	0	0	1	0	1	1	0		1	0	0	0	0	0	0	0	0		0	0	0	0	0	0	-1	0	0	0	0	0	0	0	0
TCGA-44-5643-01	LUAD	19	18	1	0	0.404381	0.56	0.44	0.0356193	0.0356193	1.174	3.30572	-1	-1	0	0	-1		-1	-1	0	-1	-1	0	-1	0	-1	0	-1	0	0	0	0	-1	1	0	-1	-1	0	-1	-1	-1	0	0	0		0	0	0
TCGA-44-5644-01	LUAD	16	10	6	1	0.112803	0.75	0.25	0.137197	0.137197	7.22681	26.1206			0		-1			-1	1	-1		-1	1	0	-1	1		-1						1	-1	0	0		-1	0		0	1	-1		1
TCGA-44-5645-01	LUAD	10	0	10	0	0.263572	0.54	0.46	0.196428	0.196428	0.260661	1.01368		1	0	0	0	0	1		1	1	0	0	1	1	0	0	0	0	0	0		1	0	0	0	0		1		0	0	0	0	0	0	1	1
TCGA-44-6144-01	LUAD	8	6	2	0	0.270418	0.54	0.46	0.189582	0.189582	1.90414	5.62028	0	1	0	0	-1	-1	0	0	0	-1	0	0	0	0			-1	-1	0	1	0	0	0	0	0	0	0	0	0	-1	0	0	0			0	0
TCGA-44-6145-01	LUAD	16	16	0	0	0.492323	0.31	0.69	0.197677	0.197677	2.30001	8.37204	0	0	0	0	-1	0	-1	-1	-1	-1	0	0	-1		-1	-1	0	0	0	0	0	0	0	0	0	-1	0	0	0	0	0	-1	-1	-1		-1	-1
TCGA-44-6146-01	LUAD	5	5	0	0	0.0898896	0.7	0.3	0.21011	0.21011	0.319427	1.01636	0	0	0	0	0	0		0	0	-1	0	0	0	0	0	0	-1	0	0	0	0	0	0	0	0	-1	0	0	0	0	0	0	-1	-1	0	0	0
TCGA-44-6148-01	LUAD	2	0	2	0	0.177418	0.3	0.7	0.522582	0.522582	0.061515	0.12303	0	0	0	0	0	0	0	0	0	0	0	0	0	0	0	0	0	0	0	0	0	0	0	0	0	0	0	0	0	1	1	0	0	0	0	0	0
TCGA-44-6774-01	LUAD	4	4	0	0	0.375201	0.45	0.55	0.174799	0.174799	2.19018	7.3198	0	0	0	0		-1	0	0		0		0	0	0	-1		0	-1	0	0	0		0	0	0	0	0	0		0	0	0	0	-1	0	0	0
TCGA-44-6775-01	LUAD	26	9	17	1	0.383369	0.27	0.73	0.346631	0.346631	0.518874	1.55662	1	1	0	0	1	0	1	1	1	0	0	-1	1	0	0		1	1	-1	-1	1	1	-1	-1	0	-1	0	1	-1	-1	1	1	-1	0	0	1	1
TCGA-44-6776-01	LUAD	4	2	2	0	0.0852466	0.65	0.35	0.264753	0.264753	1.39899	5.12963	0	1	0	0	-1	-1	0	0	0	0			0	0	0	0	0	0		0	0	0	0		0	0	0	0	0	0	0	0	0	0	1	0	0
TCGA-44-6777-01	LUAD	19	16	3	0	0.435166	0.34	0.66	0.224834	0.224834	2.82119	9.45245	0	1	0	0	0	0	-1	-1	1	0	0	-1	0	0	-1	1	-1	-1	-1	-1	0	0	0	0	-1	0	-1	0	-1	-1	0	-1	-1	0	0	-1	-1
TCGA-44-6778-01	LUAD	25	12	13	1	0.389842	0.25	0.75	0.360158	0.360158	3.13841	9.79652	1	1	0		-1	0	-1		1	-1		-1	0	1	1	1	-1			0	1	1			-1	1	-1		1	-1	0	-1	1	-1		1	1
TCGA-44-6779-01	LUAD	17	16	1	0	0.390884	0.6	0.4	0.00911643	0.00911643	0.793305	2.46806	0	0	0		-1		-1	-1	-1	-1		-1	0	0		0	-1	0	-1	0	0	0	0		-1	0	0	0	1	-1		-1	-1	-1	-1	-1
TCGA-44-7659-01	LUAD	4	1	3	0	0.191677	0.56	0.44	0.248323	0.248323	1.0945	3.81597	0	1	0	0	0	0	0	0	1	1	0	-1	0	0	0	0	0	0	0	0	0	0	0	0	0		0	0	0	0	0	0	0	0	0	0	0
TCGA-44-7660-01	LUAD	25	11	14	1	0.212074	0.58	0.42	0.207926	0.207926	2.85878	9.10143		1	0	0	-1	1	-1	-1	1	-1	0	0	1	1	-1	-1	1	-1					1	1	1	1	-1	-1	-1	-1			1		1	1	1
TCGA-44-7661-01	LUAD	5	1	4	0	0.387882	0.29	0.71	0.322118	0.322118	2.18335	7.15655	0	0	0	0	0	0	0	0	0	0	0	0	1		0		1	1	0	0	0	0	0	0	0	0	0	0	0	-1	1	0	0	0	0	0	0
TCGA-44-7662-01	LUAD	25	17	8	1	0.328807	0.33	0.67	0.341193	0.341193	3.81855	15.1861		1	-1	0	-1		0	0	1	-1	1	-1			-1	1	-1		0	-1	-1	1		-1	-1	-1	-1	0	0	-1	1	0	-1	-1	-1	1	1
TCGA-44-7667-01	LUAD	23	12	11	2	0.313921	0.37	0.63	0.316079	0.316079	3.50667	12.2581	0		1	0	0	0	-1	-1	1	-1	1		1	0	0	1	-1	-1	0		-1		1	1	-1		-1		0		1		-1	-1	1	1	1
TCGA-44-7669-01	LUAD	22	7	15	1	0.215278	0.5	0.5	0.284722	0.284722	3.21888	12.2198	1	1				1		0	1	0		0	1	1	1	1	-1		-1	-1	1	1	1		-1	-1	0	1	-1	0	0			-1	1	1	1
TCGA-44-7670-01	LUAD	27	19	8	2	0.176466	0.5	0.5	0.323534	0.323534	8.30191	29.2093		0		1	-1	1		-1	1	-1	1	-1	-1	-1	-1	0	-1	-1	-1	-1		0	1		-1		-1		-1	-1	1			-1	-1	-1	1
TCGA-44-7671-01	LUAD	16	7	9	1	0.0973799	0.58	0.42	0.32262	0.32262	1.82452	5.65013	0	1	0	0	-1	-1	0	0	0	0	1		0	0	1	1	-1		1	1	0	0	-1	-1	1	-1	0	0	0	0	0	0	0	-1		1	1
TCGA-44-7672-01	LUAD	22	13	9	1	0.521925	0.21	0.79	0.268075	0.268075	1.34096	4.11227	-1	1	-1	-1	-1	-1		0	1	1		-1	0	0	-1	1	0	0	1	-1	0	0	1		-1	-1	-1			0	0	1	-1	0	-1	1	1
TCGA-44-8117-01	LUAD	20	13	7	1	0.152012	0.66	0.34	0.187988	0.187988	6.06115	20.0438		1	0		-1	-1	-1	0	1			-1	1	1	-1	0	-1	-1	1	0		1		0		0	-1	-1	-1	-1		1	0	-1	-1
TCGA-44-8119-01	LUAD	25	17	8	2	0.151291	0.55	0.45	0.298709	0.298709	5.22138	17.2492		0	-1	-1	-1	-1	-1	-1	0			-1			-1	1	0		-1	-1		1	0	1	-1		-1	-1	-1	-1	1	1	1	-1		1	1
TCGA-44-8120-01	LUAD	13	12	1	0	0.285752	0.54	0.46	0.174248	0.174248	5.44609	16.0629	0	0	0	0	0	0	0	0	0	-1		-1	0	0	-1	1	-1	-1	0	0	0	0	-1	-1	-1			0	0	-1	0	0	0	-1	-1	0	0
TCGA-44-A479-01	LUAD	8	2	6	0	0.554133	0.36	0.64	0.0858672	0.0858672	2.09103	7.87923			0	0	0	0		-1		0	0	0	1		0	0			0	0	1	1		1	0		0	0	0	-1		0	0		0	1	1
TCGA-44-A47A-01	LUAD	23	18	5	1	0.284285	0.34	0.66	0.375715	0.375715	1.3328	5.66441		1	0	0	-1	-1	-1	-1	1	0	-1	-1	-1	-1	-1	-1	-1	-1	-1	-1	1	1	0	0	-1	0	-1	0	0	-1		0	0	0	0	-1	0
TCGA-44-A47B-01	LUAD	18	7	11	1	0.245822	0.5	0.5	0.254178	0.254178	0.396459	1.15888		1	0	0	1	1	0	0	0	0	0	0	-1	-1	1	1	0	0	0	0	0	0	-1	1	-1	1	0	1	-1	-1	0	0		0	1	1	1
TCGA-44-A47F-01	LUAD	27	14	13	2	0.217815	0.41	0.59	0.372185	0.372185	0.959185	2.36799	-1	1	-1	0	-1	-1	0	0	1	1	1	-1	1	1	1	1	0	1	0	0	-1	-1	-1	-1	-1	-1	-1	0	0	0	0		-1		1	1	1
TCGA-44-A47G-01	LUAD	3	0	3	0	0.569527	0.24	0.76	0.190473	0.190473	0.478657	1.94455		0		1		1	0		0	0	0	0	1		0	0		0	0	0	0	0	0	0		0	0	0	0		0	0		0	0	0	0
TCGA-44-A4SS-01	LUAD	16	4	12	1	0.516417	0.25	0.75	0.233583	0.233583	3.26934	12.2962			1	1		0	1		1		0	1	1	1	0	0			1	-1	-1		1	0	0	0		0					0	-1	1	1	1
TCGA-44-A4SU-01	LUAD	12	5	7	1	0.293664	0.59	0.41	0.116336	0.116336	1.18065	3.68592	0	0	0	0	0	0	1	0	0	0	1	0	1	0				-1		-1	0	0		0	-1	1		1	0	0	0	-1	-1	0	0	1	1
TCGA-49-4486-01	LUAD	2	0	2	0	0.0915776	0.73	0.27	0.178422	0.178422	1.57523	3.62599	0	1	0	0	0	0	0	0	0	0	0	0	0	0	0			0	0	0	0	0	0	0	0	1	0	0	0	0	0	0	0		0	0	0
TCGA-49-4487-01	LUAD	27	12	15	1	0.521789	0.17	0.83	0.308211	0.308211	2.73935	9.01334	0	1		-1	0	1	-1	-1	1	-1	1		1	1	-1	-1	-1		1		-1	-1	1	1	-1		-1	1	-1	0	0	1		0	1		1
TCGA-49-4488-01	LUAD	25	17	8	2	0.23271	0.45	0.55	0.31729	0.31729	2.30594	7.91909	-1	1	0	0	1		1	-1	1	-1	1	-1	1	0	-1	1	-1			0	0	-1		-1	-1		-1			-1	-1	-1		-1	-1	-1	-1
TCGA-49-4490-01	LUAD	29	16	13	2	0.351666	0.26	0.74	0.388334	0.388334	0.404371	1.18423	1	1	1	1	-1	0	0	0	1		1	1	1	1	-1		-1	-1	-1	-1		0	-1	-1	0	1	-1	1		-1	1	-1	-1	-1	-1	-1	-1
TCGA-49-4494-01	LUAD	3	1	2	0	0.304768	0.46	0.54	0.235232	0.235232	1.44965	4.6744	0	0	0	0	0	0	0	0	0	0		-1	1	1	0	0	0	0	0		0		0	0	0	0		0	0	0	0	0	0	0	0	0	0
TCGA-49-4501-01	LUAD	19	15	4	1	0.293295	0.43	0.57	0.276705	0.276705	0.678763	1.15095				-1	-1	0	-1	-1	1	1	0			0	-1	0	-1	-1	0	0	0	0	-1	-1	-1	0	-1	0	0		1	-1	-1	-1	0
TCGA-49-4505-01	LUAD	21	13	8	1	0.288165	0.45	0.55	0.261835	0.261835	1.86087	5.10329	1	1	0		-1	0	0	0	1	-1	0	-1	1	1	-1	1	-1	-1	0		0	0	0	0	0	0		1	1	-1	0	-1	-1	-1	-1	-1	0
TCGA-49-4506-01	LUAD	20	16	4	1	0.587712	0.25	0.75	0.162288	0.162288	0.881189	3.19051	-1	1	0	0	-1	-1	-1	-1	0	0	-1	-1	1	-1	0	0		-1	0	0	-1	-1	0	0	-1	0	1	0	0	0	0	-1	-1	0	0	1
TCGA-49-4507-01	LUAD	12	10	2	1	0.438485	0.35	0.65	0.211515	0.211515	1.42272	5.00917				0		0			0	-1	0	-1	0	0			-1	0	0	0		0	1		-1	-1			0	-1	1	0		-1			-1
TCGA-49-4510-01	LUAD	23	9	14	1	0.131529	0.64	0.36	0.228471	0.228471	0.360545	1.29195		1		1	1	0		1	1	1	1	0	1	0	-1	1	-1	-1		0	-1	-1	1		-1	0	0	0	-1	0	1	0		-1	1	1	1
TCGA-49-4512-01	LUAD	31	22	9	2	0.263829	0.32	0.68	0.416171	0.416171	0.406095	0.928216		-1	-1	-1	-1	-1	-1	-1	1	1	0	-1	1	1	-1	1	-1	-1	-1	-1	0	0			-1	0	-1	1	1	-1	0	-1	-1	-1	-1	-1	1
TCGA-49-4514-01	LUAD	8	7	1	0	0.487476	0.35	0.65	0.162524	0.162524	2.6461	8.02552	0	0		0	-1	0	0	0	1	-1	0	-1	0			0	-1	-1	0	0	0				0	-1	-1	0	0	0	0	0	0			0
TCGA-49-6742-01	LUAD	19	17	2	1	0.18455	0.49	0.51	0.32545	0.32545	2.45442	6.48668	0	1	0	0	-1	-1	-1	-1	-1	-1	0	0	1	-1	0	0	-1	-1	-1	-1	0	0	0	0	0	-1	0	-1	-1	0	0	-1	-1	-1		0	0
TCGA-49-6743-01	LUAD	23	16	7	1	0.450274	0.27	0.73	0.279726	0.279726	6.51513	19.1012	0	1		0	-1	1	-1	-1	1	-1	0	0	0	0	-1	-1	-1	-1	0	0			-1			0		0	-1	-1	1	-1	-1	-1	1	-1	-1
TCGA-49-6744-01	LUAD	5	3	2	0	0.442277	0.37	0.63	0.187723	0.187723	1.73705	6.00609	0	0	0	0	0	0	0	0	1	0	0	-1	0	0		0	0	0	0	0	0		0		-1		0	1		-1	0	0	0		0	0	0
TCGA-49-6745-01	LUAD	10	7	3	1	0.33046	0.24	0.76	0.42954	0.42954	0.821659	3.34533		-1	0	0		0	0	0	0	0	-1	-1	1	1		0	0	0	0	0	0	0		-1	0	0		0	0	0	1	0	0	0	0	-1	-1
TCGA-49-6761-01	LUAD	16	9	7	1	0.366213	0.29	0.71	0.343787	0.343787	1.67528	4.75659	-1	1	0	0	0	0	0	0	1	1	1	-1	1	0	-1	1	0	0	0	0	0			0		0	-1	-1	-1	-1		1		0	0	0	0
TCGA-49-6767-01	LUAD	23	11	12	1	0.348569	0.43	0.57	0.221431	0.221431	4.16129	11.8002	0	1	0	0	0	1	1	0		-1	1	1	1	1	-1	1			-1	0	-1	1	1		0	1	-1	-1	0	-1	0	-1	-1	-1	-1		1
TCGA-49-AAQV-01	LUAD	10	6	4	0	0.500739	0.25	0.75	0.249261	0.249261	0.495154	1.73304	0	1	0	0	-1	0	0	0	1		0		1	0	-1	1	-1	-1	0	0	0		-1			0	0	0	0		0	0			-1	0	0
TCGA-49-AAR0-01	LUAD	15	15	0	0	0.33529	0.51	0.49	0.15471	0.15471	1.27946	3.38143	0	0	-1		-1	0	-1	-1	0	0	0	-1	0		0		-1	-1	-1	-1	0	0		-1	-1			0	0	-1	-1	0			-1	0	0
TCGA-49-AAR2-01	LUAD	9	7	2	0	0.274197	0.69	0.31	0.035803	0.035803	3.13144	11.054	0	0	0	0	-1	0	0	0		-1	0	0	0	0	0		-1		1	0	0		0	0	0	0	0	0	0	0	0	-1	1	-1		0	0
TCGA-49-AAR3-01	LUAD	10	10	0	0	0.545492	0.32	0.68	0.134508	0.134508	0.829253	3.22487		0	0	0	-1	-1	0	0	-1	-1	0	-1	0		0	0	-1	0	0	0	-1		0	0	-1	0		0	0	0	0	-1	-1	0	0	0	0
TCGA-49-AAR4-01	LUAD	8	7	1	0	0.587917	0.22	0.78	0.192083	0.192083	3.9373	14.7098	0	0	0	0	0	0	0	0	1	-1	-1	0	0	0	-1	0	-1		0	0	0	0	0	0	0	0	0	0	0	-1	0	0	-1	0	0	0	0
TCGA-49-AAR9-01	LUAD	11	7	4	0	0.164434	0.75	0.25	0.0855656	0.0855656	5.69748	16.9376	0	1	1	0			0	0	1		0	-1			-1	0	-1	0		0	0	0			-1	0	0	0	0	-1		0		-1			1
TCGA-49-AARE-01	LUAD	19	13	6	1	0.289299	0.42	0.58	0.290701	0.290701	11.0272	35.2745	-1		1		-1	0	0	-1		-1		-1	1	0	1	1	0	0	1	-1	0		-1		0	-1				-1	0	-1	-1			1	-1
TCGA-49-AARN-01	LUAD	7	7	0	0	0.362703	0.43	0.57	0.207297	0.207297	4.9711	20.0388	0	0	0	0	0	0	0	0	0	0	0	-1	0	0	-1	0	0	0	0	0	0	0	-1			0	-1	0	0	-1	0	-1	-1	0	0	0	0
TCGA-49-AARO-01	LUAD	21	11	10	1	0.394894	0.28	0.72	0.325106	0.325106	4.44398	16.0175		1	1	-1	0	0	0	0		-1		-1		1	-1	1		-1	0	0	0	1	1	0	-1	1	-1	1	0	-1	1		-1	-1	-1
TCGA-49-AARQ-01	LUAD	17	5	12	1	0.245454	0.52	0.48	0.234546	0.234546	5.30705	19.6936		1	1	1	1	1	1	0			0	0	1	1			1	0	-1	-1	0	0	1		0	1	-1			-1		0	0		0	-1	1
TCGA-49-AARR-01	LUAD	0	0	0	0	0.378259	0.64	0.36	-0.0182594	0	0.0304174	0	0	0	0	0	0	0	0	0	0	0	0	0	0	0	0	0	0	0	0	0	0	0	0	0	0	0	0	0	0	0	0	0	0	0	0	0	0
TCGA-4B-A93V-01	LUAD	26	19	7	1	0.244927	0.62	0.38	0.135073	0.135073	0.936517	3.77728	-1	1	-1		-1	-1			0	-1	-1	-1	1	0			-1	1	1	-1	-1		-1		-1			1	1	-1	-1	-1	1	-1	-1	0	0
TCGA-50-5044-01	LUAD	1	0	1	0	0.412318	0.23	0.77	0.357682	0.357682	1.45192	3.31867		1	0	0	0	0	0	0	0	0	0	0	0	0	0	0	0	0	0	0	0		0	0	0	0	0	0	0	0	0	0	0	0	0	0	0
TCGA-50-5045-01	LUAD	3	0	3	0	0.467013	0.22	0.78	0.312987	0.312987	2.00359	8.35344	0		0	0	0	0	0	0	1	0	0	0	1	0		0	0	0	0	0	0	0	0	0			0	0	0	0	0	0	0	0	0	1
TCGA-50-5049-01	LUAD	15	9	6	0	0.568416	0.26	0.74	0.171584	0.171584	6.15152	21.9206	0	0	0	0	-1	0	-1	-1	1	-1	-1	-1	1	1	-1		0		1		0	0	0	0	0	0	-1		-1		0		0		1	1
TCGA-50-5051-01	LUAD	22	15	7	1	0.20476	0.59	0.41	0.20524	0.20524	1.12646	2.83059	-1	1	0	0	0	0	-1	-1	1	1		-1	0	0	1	1	0		0	1	0	0	-1	1	-1	0	-1	0	0	-1	-1	0		-1	-1	-1	-1
TCGA-50-5055-01	LUAD	1	0	1	0	0.617936	0.13	0.87	0.252064	0.252064	0.030095	0.571804	0	0	0	0	0	0	0	0	0	0	0	0	1	0	0	0	0	0	0	0	0	0	0	0	0	0	0	0	0	0	0	0	0	0	0	0	0
TCGA-50-5066-01	LUAD	11	6	5	1	0.486015	0.27	0.73	0.243985	0.243985	1.8013	7.42258	0	0	0	0	0	0	0	0		0	0	0	1	1	-1	1	0	0	0	0	0	0	0	0		0	-1	-1	-1	0	0	0	-1	0		1	1
TCGA-50-5066-02	LUAD	20	12	8	2	0.275078	0.41	0.59	0.314922	0.314922	0	0		1	1		0	0	-1	-1	1	-1	0			0	-1	1	-1	0	-1	-1		0		0		1	-1	-1	-1	0	0	0	-1	-1		1	1
TCGA-50-5068-01	LUAD	32	19	13	1	0.475863	0.24	0.76	0.284137	0.284137	0.857861	2.35912	1	1	0	0	-1	-1	0	0	1	-1	-1	-1	1	1	-1	1	-1	-1	1	1	1	1	-1	-1	-1	-1	-1	-1	-1	-1		1	-1	0	0	1	1
TCGA-50-5072-01	LUAD	27	23	4	1	0.32159	0.4	0.6	0.27841	0.27841	1.25098	4.16023	0	0	0	0	-1		-1	-1	-1	-1	-1	-1	1			0	-1	-1	-1	-1	-1	-1	1	1	-1	-1	1	-1	-1	0	0	-1	-1	-1		-1	-1
TCGA-50-5930-01	LUAD	2	0	2	1	0.438796	0.95	0.05	-0.388796	0	8.32981	28.6848	0	0	0	0	0	0	0	0	1	0	0	0	0	1	0	0	0	0	0	0	0	0	0	0	0	0	0	0	0	0	0	0	0	0		0	0
TCGA-50-5931-01	LUAD	12	8	4	0	0.0836685	0.86	0.14	0.0563315	0.0563315	2.42715	8.37055	0	1	0	0	-1	1	0	0	1	0	0	0	0		-1	0	-1	-1	-1		0	0	0	0	-1	-1	0	0	0	-1	0	0	0		0	0	0
TCGA-50-5932-01	LUAD	11	9	2	0	0.0800958	0.84	0.16	0.0799042	0.0799042	0.493177	2.096		1	0	0	-1	-1	0	0	0	0	1	-1	0		-1		-1	-1	0	0	0		0		0	0	0	0	0	0	0	0	0	-1		0	0
TCGA-50-5933-01	LUAD	24	20	4	1	0.365416	0.3	0.7	0.334584	0.334584	4.01192	13.4752	0		-1	-1	0	0	0	0		-1	1	-1	1	0	-1	1	-1	-1	0	0	-1	1	0	0	-1	-1	-1	0	-1	-1		-1	-1	-1	-1	-1	0
TCGA-50-5935-01	LUAD	21	11	10	2	0.194456	0.39	0.61	0.415544	0.415544	0.573644	2.53611	-1	1	0	0	-1	-1	0	0	1	1	1	-1	0		0	0	-1	-1	0	0	0	0		0	-1	-1	-1	1	1	1	1	0	0			1	1
TCGA-50-5936-01	LUAD	14	14	0	0	0.271949	0.6	0.4	0.128051	0.128051	0.925815	3.11691	-1	0	0	0		0	0	-1	0	0	0		0	-1	0	0	-1	-1	0	0	-1	-1	0	0	-1	0	0	0		-1	0	-1	-1	-1	0	-1
TCGA-50-5939-01	LUAD	7	7	0	0	0.450484	0.38	0.62	0.169516	0.169516	0.550472	2.04898	0	0	0	0	-1	0	0		0	0			-1	0	-1	0	-1		0	0	-1	0				0	0	0		0	0	0		-1	-1		0
TCGA-50-5941-01	LUAD	32	17	15	1	0.44653	0.27	0.73	0.28347	0.28347	2.78012	9.89483	1	1	1	1	-1		-1	-1	1		1	-1	1	1	-1	1		-1	-1	-1			1	-1	-1	1	-1	-1	-1	-1	1	-1	-1	0	0	1	1
TCGA-50-5942-01	LUAD	2	2	0	0	0.140457	0.69	0.31	0.169543	0.169543	0.394406	1.60796	0	0	0	0	0	0	0	0	0	0	0	-1	0	0	0	0	0	0	0	0	0	0	-1	0	0	0	0	0	0	0	0	0	0	0	0	0	0
TCGA-50-5944-01	LUAD	17	5	12	1	0.102436	0.57	0.43	0.327564	0.327564	0.545641	1.51567	1	1	0	0		0	0	0	1	0	1	0	1	1	1	1	-1	-1	0	0	0	0	1	1	-1				0		1	0	0	-1	0	-1
TCGA-50-5946-01	LUAD	21	17	4	2	0.262778	0.75	0.25	-0.0127781	0	5.56373	16.8746	0	1	0	-1	0	0	-1	-1	1	-1	1	-1	1	0	0	0	-1	-1	0		-1		-1		-1	0	-1	-1	-1	-1	0	-1	-1			0	0
TCGA-50-5946-02	LUAD	20	18	2	1	0.0683258	0.9	0.1	0.0316742	0.0316742	0	0	0			-1	0		-1	-1	1	-1		-1	1		-1	-1	-1		0	0	-1		-1		-1		-1	-1	-1	-1	0	-1	-1			0	0
TCGA-50-6590-01	LUAD	19	13	6	1	0.480646	0.25	0.75	0.269354	0.269354	6.57228	23.3045	0		-1		0	0	-1		0	-1	1	-1	1	1	-1		0	0	-1	0	0	0		0	-1	1	-1	-1	-1	0	0	0	-1	0	0	1	1
TCGA-50-6591-01	LUAD	28	20	8	2	0.0574123	0.9	0.1	0.0425877	0.0425877	0.431936	1.48092		1	-1	-1	-1		0	0	0	0	1	1	1	-1	-1	0	-1	-1	-1	-1	-1	-1	-1	-1	1	1		-1	-1	-1	0	1		-1	-1	0	1
TCGA-50-6592-01	LUAD	14	2	12	1	0.499543	0.28	0.72	0.220457	0.220457	2.20152	7.29817	0	0	1	1	0		1	0	1	0		0	0		1	1	-1	0	1	-1	0	0	1	1	1	0	0	0	0	0		0	0	0		1	1
TCGA-50-6593-01	LUAD	29	20	9	1	0.288504	0.31	0.69	0.401496	0.401496	2.55557	8.36646		1	1	1	-1		0	0	1	-1	0		1		-1	1	-1	-1	-1	1	-1		-1	-1	-1	-1	-1		-1	-1	1	1	-1	-1	-1	-1	-1
TCGA-50-6594-01	LUAD	17	12	5	1	0.174477	0.6	0.4	0.225523	0.225523	3.76603	14.5436	-1	0	0	0	-1	0	1		1			-1	1	0	-1			-1		0	-1	-1	-1	0	0		-1	0	0	-1	1	0	-1	-1			0
TCGA-50-6595-01	LUAD	12	0	12	1	0.514765	0.22	0.78	0.265235	0.265235	0.529245	2.44041	0	1	0	0	0		0	0	0		0	0	1	1		0	1	1	0	0	0	0	1	0	0		0	1	1	0	0	0	0	1	1	1	1
TCGA-50-6597-01	LUAD	15	14	1	1	0.274502	0.48	0.52	0.245498	0.245498	0.382513	1.35351	0	0	0	0	-1	-1	0	0		0	0	0		-1	-1		-1		-1	-1	0	0	0		-1	-1	-1	0	0		1	-1	-1			-1	0
TCGA-50-6673-01	LUAD	18	14	4	1	0.286284	0.35	0.65	0.363716	0.363716	0.358886	1.46545	0	0	0		-1	-1	-1	-1	0	0	1	1	1	-1	-1		-1	-1	0	-1	-1	-1	0	0	0		-1	0	0	-1	-1	0	0	0	0	0	0
TCGA-50-7109-01	LUAD	21	15	6	1	0.286207	0.44	0.56	0.273793	0.273793	1.88065	6.5972	-1	-1	-1	0	-1				1	-1	1	0	0	0		1	-1	-1	1		-1	-1	0	0	-1	1	-1	0	0	-1	0	1	0	-1	0	0
TCGA-50-8457-01	LUAD	3	1	2	0	0.331844	0.6	0.4	0.0681564	0.0681564	0.38544	1.51211	0	1	0	0	0	0	0	0	0	0	0	0	0	0	0	0	0	0	0	0	0	0	-1	0	0		0	1	0	0	0	0	0	0	0	0	0
TCGA-50-8459-01	LUAD	4	4	0	0	0.377336	0.29	0.71	0.332664	0.332664	0.854115	2.23837		0	0	0	0	0	0	0	0	0	0	0	0	0	0	0	-1	-1	0	0	0	0		0	0	0	0	0	0	0	0	-1	-1	0	0	0	0
TCGA-50-8460-01	LUAD	8	5	3	0	0.354412	0.42	0.58	0.225588	0.225588	0.176474	0.735307	0	1	0	0	0	0	0	0	0	0	0	0	0	0	0	0	-1	-1	0	0	0	0	0	0	-1	0	-1	1	1	0	0	0	0	0	0	-1
TCGA-53-7624-01	LUAD	18	11	7	1	0.177641	0.69	0.31	0.132359	0.132359	6.50103	21.4895	0				-1		1		1	-1	1	0	1	-1	-1			0			-1	1	0		1			-1	0	-1		-1	-1		1	-1
TCGA-53-7626-01	LUAD	10	9	1	0	0.378273	0.42	0.58	0.201727	0.201727	2.9626	10.2576			0	0	-1	0	-1	0	1	-1	-1	-1	0	0	-1			0	0	0	0	0	0	0		0	-1	0	0		0	-1	-1	0	0	0	0
TCGA-53-7813-01	LUAD	20	18	2	1	0.374193	0.36	0.64	0.265807	0.265807	0.871904	4.29724	-1	1	-1				0	-1	0	0	0	-1	-1	-1	-1	1	-1	-1	0	-1	0	0	0	0	-1	0	-1	-1	-1	-1	0	0	0	-1	0	0	0
TCGA-53-A4EZ-01	LUAD	23	14	9	1	0.316972	0.47	0.53	0.213028	0.213028	4.36218	12.4308	0		1	1	-1	1	-1	-1		-1	1	-1	0	1	-1	1	-1	0	0	0	-1				-1	1	-1	-1	-1	0	0	0		-1	1	1
TCGA-55-1592-01	LUAD	22	10	12	1	0.231461	0.49	0.51	0.278539	0.278539	3.93318	13.0357	1	1	1			0	0		1	-1	1		1	1			-1	-1	0	-1	1	1		-1		0	-1	0	0	-1		0		-1	-1	1	1
TCGA-55-1594-01	LUAD	23	12	11	1	0.229643	0.55	0.45	0.220357	0.220357	1.59391	4.39025	0	0	1	1	-1	1	1		1	-1		0	0	-1	-1	0	-1	-1	0		1	1	1	1			1	0	0	-1		-1	-1	-1		-1	1
TCGA-55-1595-01	LUAD	25	18	7	1	0.217166	0.52	0.48	0.262834	0.262834	2.54638	7.92208	-1	1	0	0					1	1	0	-1		-1	-1	1	0	0	-1	-1	-1	-1	1	1	-1	-1	-1	0	-1	-1	1	-1		-1	-1	-1
TCGA-55-1596-01	LUAD	28	12	16	1	0.233687	0.63	0.37	0.136313	0.136313	1.14314	4.895	0	1	1		-1	1	1			-1	1	0	1	1	-1	1	-1	-1		1	-1		1	1	-1	0		1	1	-1	0	-1	-1	-1	-1	1	1
TCGA-55-5899-01	LUAD	19	13	6	1	0.1809	0.67	0.33	0.1491	0.1491	3.85132	11.6151		0	0	0		-1	0	0	1	-1		0	1	0	-1	1	-1		0	-1	-1				-1	1	-1	-1	0	-1	1		0	-1	-1	1
TCGA-55-6543-01	LUAD	10	1	9	0	0.187906	0.65	0.35	0.162094	0.162094	0.120501	0.632633	0	0	0	0	0	0	0	0	1	1	0	-1	1	1	0		0	0	0	0	1	1	0	0	0	1	0	0	0	0	0	0	0	0	0	1	1
TCGA-55-6642-01	LUAD	15	14	1	1	0.369819	0.37	0.63	0.260181	0.260181	1.06312	3.24843	-1			-1	-1	-1	-1	-1	0	0	0	-1	0			1	-1	-1					0	0	-1		-1	-1	-1	0	0			0	0	0	0
TCGA-55-6712-01	LUAD	21	7	14	1	0.473692	0.29	0.71	0.236308	0.236308	1.60932	3.33785	1		-1				1	1		0	1	0	1	1	0	1	-1	-1	0	0	1	1	1		-1		-1	1		-1	1	0	0	0	0	-1	1
TCGA-55-6968-01	LUAD	12	11	1	0	0.311301	0.65	0.35	0.0386995	0.0386995	4.34525	12.8245		1	0	0	-1	0	-1	-1	-1	-1	-1	-1		0	0	0	0	0	0	0		0		0		0				-1	0		0	-1	0		0
TCGA-55-6969-01	LUAD	24	20	4	1	0.491108	0.25	0.75	0.258892	0.258892	3.44126	11.1317	0	1		-1	-1				1	-1	-1	-1			-1	1	-1	-1	-1	-1	-1	-1	0		-1	-1	-1	0		0		-1	-1	-1			1
TCGA-55-6970-01	LUAD	13	0	13	0	0.321536	0.56	0.44	0.118464	0.118464	1.09633	4.7705	0	1	1	1	0	0	0	0	1		1	0	0	0	0	1	0	0	1	1	0	0	0	0	0	0	0	0	0	0	0	1	1	0		1	1
TCGA-55-6971-01	LUAD	22	9	13	1	0.434558	0.23	0.77	0.335442	0.335442	0.601471	2.34574		1	1	1		0	-1		0	0	-1	-1	1	1	1	1	0	0	1	-1	1		1	1	0	1	-1	-1	-1	0		1	-1			0	0
TCGA-55-6972-01	LUAD	18	13	5	1	0.0172851	0.83	0.17	0.152715	0.152715	2.42653	6.94595		1	-1	-1	0		0	0	1			-1	0	0		1	0	0	1	1	-1	-1	-1	-1	0	0		-1	-1	-1	-1	0	0			0
TCGA-55-6975-01	LUAD	13	13	0	0	0.364616	0.46	0.54	0.175384	0.175384	0.507974	2.1813	0	0	0	0	-1	-1	0	0	0	-1	0	0	0	0	-1		-1	-1	0	0			0	0	0	0	0		0	-1		-1	-1	-1	-1	-1	0
TCGA-55-6978-01	LUAD	4	2	2	0	0.495882	0.26	0.74	0.244118	0.244118	0.208478	0.744564	0	0	0	0	0	0	0	0	0	0		0	1		0	0	0	0	0	0	0	0	0	0	-1	0	0	0	0		1	0	0	0		-1	0
TCGA-55-6979-01	LUAD	13	12	1	0	0.467539	0.33	0.67	0.202461	0.202461	0.889932	3.55973	0	0	0	0	0	0	-1	-1	0	-1	0	0	1		-1	0	0	0	-1	-1	0	0	-1	-1	-1	0		-1	-1	-1	0	0	0	0		0	0
TCGA-55-6980-01	LUAD	15	6	9	0	0.379753	0.31	0.69	0.310247	0.310247	0.0911592	0.42541	1	1	0	0	0	0	0	0	1	1	0	0	1	1	-1	0	-1	-1	0	0	0	0	0	0	-1	0	0	1	1		0	0	-1	0	0	-1	0
TCGA-55-6981-01	LUAD	24	10	14	1	0.394753	0.26	0.74	0.345247	0.345247	0.239671	1.37811	1	1	1	1	0	0	0	0	1		0	0	1		-1	1	-1	-1	-1	-1	1	1	1	-1	-1		-1	0	0	-1	1	0	0	-1	0	1	1
TCGA-55-6982-01	LUAD	22	19	3	1	0.33134	0.25	0.75	0.41866	0.41866	2.09008	5.47542	0	0	0	0	-1	-1	0	0		-1	-1	-1	1		-1	1	-1	-1	-1	-1	0	0	0		-1		-1	0		-1	1	-1	-1	-1	-1	-1	-1
TCGA-55-6983-01	LUAD	6	3	3	0	0.380756	0.27	0.73	0.349244	0.349244	0.775404	2.9525	0	1	1	1	-1	-1	0	0	0	0	0		0	0	0	0	0	0	0	0	0	0	0	0	0	0		0	0	0	0	0	0	0	0	0	0
TCGA-55-6984-01	LUAD	6	3	3	1	0.359703	0.81	0.19	-0.169703	0	0.222208	0.603135	0	1	0	0	0	1	0	0	0	0	0		0	0	0	0	0	0	0	0	0	0	1	-1	0	0	0	0	0	-1	0	0	0	0	0	-1	0
TCGA-55-6985-01	LUAD	13	8	5	0	0.402649	0.39	0.61	0.207351	0.207351	3.73246	12.2952	0	0	0	0	-1		-1		1	0	1	-1	1	1	0	0	-1	-1	0	0	-1		1	0	0	0		0	0	-1	0	0	0	0	0	0	0
TCGA-55-6986-01	LUAD	0	0	0	0	0.312024	0.4	0.6	0.287976	0.287976	0.249834	0.530897	0	0	0	0	0	0	0	0	0	0	0		0	0	0	0	0	0	0	0	0	0			0	0	0	0	0	0	0	0	0	0	0	0	0
TCGA-55-6987-01	LUAD	7	1	6	1	0.610384	0.16	0.84	0.229616	0.229616	1.39752	5.52932	0	1	0	0	0		0	0	1	0	0	0	1	1	0	0	0		0	0	0	0	1	1	-1	0		0	0	0	0	0	0	0	0	0	0
TCGA-55-7281-01	LUAD	18	10	8	1	0.320708	0.42	0.58	0.259292	0.259292	3.30852	12.0229	1	1	1	1	0	0	0	0	1	-1	0	0	0	0	0	0	-1	0	-1	-1	0	0	0	0	1	-1	-1	1	-1	-1	1	-1	-1	0	0	0	0
TCGA-55-7283-01	LUAD	18	12	6	2	0.176558	0.47	0.53	0.353442	0.353442	1.65492	5.717	-1	1	1	1	0	-1	0	0	0	0	1	-1	1	1	-1		-1	-1		0	0			-1		-1	-1	0	0	0		-1	-1	0			0
TCGA-55-7284-01	LUAD	10	0	10	0	0.228858	0.4	0.6	0.371142	0.371142	0.451162	1.08279	0	1	0	0	0		0	0	0	0		0	1	1	0	0	0	0	0		0	0	1	1	0	0	1	1	1	0	0	0	0	0	0	1	1
TCGA-55-7570-01	LUAD	10	9	1	0	0.325854	0.57	0.43	0.104146	0.104146	2.81638	9.91727	0	0	0	0	-1	0	0		1	-1	0	0	0	0	-1	0	-1	-1	0		-1	0	0	0	0	0	0	0	0			-1	0	-1	-1	0	0
TCGA-55-7573-01	LUAD	16	8	8	1	0.289832	0.33	0.67	0.380168	0.380168	0.388232	1.28415	1	1	1	1	0		1		1		1	0		0	-1	-1	-1	-1	0	0		0		0	-1	0		1	0	-1	0	-1	-1	0	0		0
TCGA-55-7574-01	LUAD	11	3	8	1	0.508642	0.19	0.81	0.301358	0.301358	1.77477	6.53705	1		0	0	0	0	0	0	0	0		0	0	0	0		0	0	0	0	1	1	1	1	0	0	0	-1		0	0	-1	-1	1	1	1	0
TCGA-55-7576-01	LUAD	19	13	6	1	0.22629	0.47	0.53	0.30371	0.30371	3.18496	10.2159	0	1	1	1	-1		0			-1		-1	1		-1		-1	1	0	0		0	1	0	-1	0	-1	0		-1		-1	-1	-1	0		0
TCGA-55-7724-01	LUAD	11	10	1	0	0.393258	0.28	0.72	0.326742	0.326742	1.65271	5.9069		0	0	0	-1	0	-1	-1	1	-1	0	0	0	0	0	0	-1	0	0	0	0	0	0	0	-1			0		-1	-1	-1	-1	0	0	0	0
TCGA-55-7725-01	LUAD	6	3	3	0	0.260489	0.61	0.39	0.129511	0.129511	1.24791	3.61236	0	1	0	0	0	0	0	0	1	0	0	-1	0	0	0	1	0	0	0	0	0	0	0	0	0	0	0	0	0	0	0	0	-1	0	0	-1	0
TCGA-55-7726-01	LUAD	23	12	11	2	0.267889	0.26	0.74	0.472111	0.472111	0.906368	3.09415	0	0	0	1	-1	1	-1	-1	1	-1	-1	-1	1	1	-1	0	-1			0	0	0	1	1	0	0	0	1	-1	-1	0		-1	0	0	1	1
TCGA-55-7727-01	LUAD	12	8	4	0	0.290876	0.56	0.44	0.149124	0.149124	2.46194	6.63082	0	1	0	0	0	0	0	0	1		0		0	0		0	0	0	0	0	0	0	-1	-1			-1	-1	-1	-1	1	0		-1	-1	0	0
TCGA-55-7728-01	LUAD	1	1	0	0	0.367101	0.42	0.58	0.212899	0.212899	0.625137	2.47078	0	0	0	0	0	0	0	0	0	0	0	0	0	0	0	0	0	0	0	0	0				0	0	0	0	0	0	0	0	-1	0	0	0	0
TCGA-55-7815-01	LUAD	25	5	20	1	0.412693	0.29	0.71	0.297307	0.297307	1.18622	3.64991	0	1	1	1	1		-1		0	0	1	-1	1		1	1	1	1	1	1	0	0		1	-1	1	-1		0	1	1	1	1	0	0	1	1
TCGA-55-7903-01	LUAD	7	5	2	0	0.262008	0.64	0.36	0.0979918	0.0979918	1.28718	4.08131	0		0	0	0	0	0	0	1	0	0	-1	0	0	-1	0			0	0		0	0	0	-1	0	-1		0		1	0	0	0	0	-1	0
TCGA-55-7907-01	LUAD	24	20	4	1	0.299867	0.39	0.61	0.310133	0.310133	9.20646	32.3341	-1			1	-1	0	-1	-1	-1	-1	-1	-1	0	0	0	1	-1	-1	-1		-1	-1	0	-1	0	0	-1	0	-1	1	1	0	-1	-1		-1	0
TCGA-55-7910-01	LUAD	20	7	13	1	0.209257	0.58	0.42	0.210743	0.210743	2.12721	8.7311	0	1	1	1	-1		-1		1		0	1	1	1	0		0	0	1		0	1		1	1			1	1	-1	0	-1	-1	-1	0	0
TCGA-55-7911-01	LUAD	14	8	6	1	0.416744	0.23	0.77	0.353256	0.353256	1.81413	5.91156	-1	1	1	1	0	0	0	0	1	1	0	-1	0	0	0			-1	0	0	0	0	1	-1	-1	0	0	0	0	-1		0	0	0	0	0	0
TCGA-55-7913-01	LUAD	19	12	7	1	0.497364	0.35	0.65	0.152636	0.152636	2.73886	8.81854	-1	1	0	0	-1	1	-1	-1	0	-1		-1	1	0	-1			0		1	0	0		0	-1		0	-1	-1	0	0	-1		-1	1	1	1
TCGA-55-7914-01	LUAD	9	7	2	0	0.329963	0.56	0.44	0.110037	0.110037	1.41319	4.85401		1	0	0	-1	0	0	0	0	0		-1	0	0	-1			-1	0	0	0	0	-1		0	0		-1	0	-1	0	0	0	0	0	0	0
TCGA-55-7994-01	LUAD	16	12	4	1	0.315335	0.51	0.49	0.174665	0.174665	12.0541	40.8146	0		0	0		1	0	0				-1			-1	1	0	-1	0	-1	-1	1	0		-1			0	0	-1	1		-1	-1	-1	-1	0
TCGA-55-7995-01	LUAD	23	18	5	1	0.3483	0.49	0.51	0.1617	0.1617	4.96153	17.1561	-1	0	0	0	-1	1	-1		-1	-1	0		-1		-1	-1	0	0	-1	-1	1		1		-1		-1	1	-1	-1	0	-1	-1	-1		1	0
TCGA-55-8085-01	LUAD	6	2	4	0	0.315255	0.56	0.44	0.124745	0.124745	2.31498	6.6443	0	1	0	0	0	1	0	0	0	0	1	-1	1	0			0		0		0		0	0	0		0	0			0	0	0	-1		0	0
TCGA-55-8087-01	LUAD	5	4	1	0	0.0732822	0.82	0.18	0.106718	0.106718	0.207367	0.799845	0	1	0	0	0	0	0	0	0	0	0	0	0	0	0	0	0	0	0	0	0	0	-1	0	0	0	0	0	0	0	0	-1	-1	0	0	0	-1
TCGA-55-8089-01	LUAD	11	9	2	0	0.52071	0.33	0.67	0.14929	0.14929	9.89315	30.9569	0	0	0		0	0	0	0	0	0	-1	-1	0	0	0		-1	-1	0	0	-1	0	0	0				-1	1	-1	0	1		-1	0	0	0
TCGA-55-8090-01	LUAD	14	14	0	1	0.213097	0.41	0.59	0.376903	0.376903	0.781994	2.25575	-1	-1	0	0	-1	-1	0	0	0	0	-1	-1			0	0	-1	-1	0	0	0	0	0		-1	0	0	0	0	0	0	-1	-1	0	0	-1	-1
TCGA-55-8091-01	LUAD	13	6	7	0	0.261419	0.6	0.4	0.138581	0.138581	0.152025	0.790529		0	0	0	0	0	1	1	1	1	-1	-1	1		0	0	-1		0	0	0	0	0	0	-1	1	-1	0		-1	0	0	0	0	0	0	0
TCGA-55-8092-01	LUAD	16	6	10	2	0.362987	0.38	0.62	0.257013	0.257013	5.28801	13.933	0	1	0	0	0	0	0	-1	0	0	0	0	1	1	-1	1	-1	0	1	0		1				-1	0	1	1			0	0	-1	1		1
TCGA-55-8094-01	LUAD	18	13	5	1	0.0643293	0.79	0.21	0.145671	0.145671	3.92083	11.7625	0	1		0	-1	-1	1	-1	1	-1	0	-1	0	0	0			-1	0	-1	0		1	0	-1	-1	-1	-1	0		1			-1
TCGA-55-8096-01	LUAD	24	19	5	1	0.360569	0.25	0.75	0.389431	0.389431	1.07949	3.70528		1	0	0	-1	-1		-1	1	-1	-1	-1	1		-1	0	-1	-1	-1	-1	0	0	0		-1	0	-1	1	-1	-1	-1	1		-1	-1	0	0
TCGA-55-8097-01	LUAD	6	2	4	0	0.186083	0.64	0.36	0.173917	0.173917	0.814495	2.76346	0	0	0	0	0	0	0	0	0	0	0	0	0	0	-1	1	0	0	0	0	0	0	0	0	0	0	0	1	1	-1	0	0	0	0	0	1
TCGA-55-8203-01	LUAD	20	14	6	1	0.331952	0.38	0.62	0.288048	0.288048	3.45755	11.4317	-1	1	0		0		-1	-1	-1	-1	1	-1	0	0	1	1	-1	-1	0	0	1		0	0	-1	1	-1	0	0	0	0	0	0	-1	-1	0	0
TCGA-55-8204-01	LUAD	10	6	4	0	0.399943	0.34	0.66	0.260057	0.260057	1.63148	5.36058	0	0	0	0	-1	0	-1	-1	1	-1	0	0	0	0	-1	1		-1	0	0	0			0		1	0	0	0	0	0	0	0	0	0	0	0
TCGA-55-8205-01	LUAD	22	9	13	2	0.453479	0.22	0.78	0.326521	0.326521	4.29719	13.4843	-1	-1	1	1	0	1	0		0	0	1	0	1	1	-1	1	0	0	0	1	1		0	0	1	0	-1	-1	-1	-1	1	0	0	0	0	1	1
TCGA-55-8206-01	LUAD	20	5	15	1	0.264924	0.46	0.54	0.275076	0.275076	0.242316	0.726949	1	1	0	0	-1	-1	0	0	1	1	1	1	1	1	1	1	-1	-1	0	-1	0	0	0	0		1	0	1	1	0	0	0	0	0	0	1
TCGA-55-8207-01	LUAD	15	9	6	1	0.165437	0.57	0.43	0.264563	0.264563	2.614	8.02229	0	1	0		0	0	0	0	1		1	-1	0		-1	0	-1	-1	0	-1	0	0	0	0	-1	0		0			1	-1	-1	0	0		1
TCGA-55-8208-01	LUAD	9	2	7	0	0.526583	0.24	0.76	0.233417	0.233417	2.76785	8.04133	0		0	0	-1	1	0	0	1	-1		0	0		0	0	1		0	0	0	0	1	1	1	1	0	0	0	0	0	0	0	0	0	0	0
TCGA-55-8301-01	LUAD	8	5	3	0	0.486923	0.26	0.74	0.253077	0.253077	2.21703	6.67917	0	1	0	0	0	0	0	0		0	0		0	0	-1	1	1	0	0	0	0	0	0		-1		-1	0	0	0	0	0	0	-1		0	0
TCGA-55-8302-01	LUAD	12	12	0	0	0.308551	0.46	0.54	0.231449	0.231449	4.9187	16.7291	0	0	0	0	0	0		0		-1	0	0	0	0	-1		0	-1		-1	-1	-1		0	-1	0	-1	0	0	-1	0	0	0	-1	-1	0	0
TCGA-55-8505-01	LUAD	6	5	1	0	0.404155	0.32	0.68	0.275845	0.275845	0.439568	0.791223		0	0	0	0	0	0	0		-1	0	0	0	0	0	0	-1	-1	0	0		0	0	0	0	0	1	-1	-1	0	0	0		0	0	0	0
TCGA-55-8506-01	LUAD	13	8	5	1	0.246189	0.45	0.55	0.303811	0.303811	14.2391	43.9452	0	1	0	0	-1	0	0	0	1	-1	-1	-1	0	0	-1	-1	-1	0	0	0	0	1	0	0				1	-1			0	0	0	0		1
TCGA-55-8507-01	LUAD	22	18	4	1	0.163686	0.64	0.36	0.196314	0.196314	7.10599	24.4125	0	1			-1	0	-1	-1		-1	1		-1		0		-1	-1	-1		-1	0		0			-1	-1	-1	0	1	-1	-1	-1	-1		1
TCGA-55-8508-01	LUAD	13	8	5	1	0.404283	0.38	0.62	0.215717	0.215717	1.37613	4.50108		1				0	0	-1			0	-1		0	0	0	0	-1	0	-1	0	0				0	-1	0	0	0	0	1	1	-1	0	1	1
TCGA-55-8510-01	LUAD	25	18	7	1	0.410543	0.28	0.72	0.309457	0.309457	2.49813	7.37954		1	1	1	-1		-1	0	1	-1	0	-1	1	1	-1		-1	-1	-1	-1	-1			-1	-1		-1		-1	-1	1	0	-1	-1	0	0	0
TCGA-55-8511-01	LUAD	20	11	9	1	0.457748	0.19	0.81	0.352252	0.352252	4.4691	14.1808		1	1			0	0	0	1	-1	1	-1	1	1	-1	1		0	1		-1	1	-1	-1				0		-1			-1	0	-1	-1	-1
TCGA-55-8512-01	LUAD	9	5	4	0	0.226482	0.35	0.65	0.423518	0.423518	0.343124	0.886403		0	0	0	0	0	0	0	0	0	1	-1	0	0	0	0	-1	-1	0	0	0	0	0	0	0	0	0	1	1	0	0	0	0	-1	0	1
TCGA-55-8513-01	LUAD	0	0	0	0	0.365327	0.5	0.5	0.134673	0.134673	0	0.172242	0	0	0	0	0	0	0	0	0	0	0	0	0	0	0	0	0	0	0	0	0	0	0	0	0	0	0	0	0	0	0	0	0	0	0	0	0
TCGA-55-8514-01	LUAD	26	12	14	1	0.231814	0.54	0.46	0.228186	0.228186	2.10222	6.8826	1	1			-1	-1	-1	-1	1	-1	1	1	1		0	1	1	-1	-1	-1	1	1	-1	-1	-1			0		-1	1	0	0	0		1	1
TCGA-55-8614-01	LUAD	23	15	8	1	0.256871	0.32	0.68	0.423129	0.423129	2.22382	5.61658	0	0	0	0	-1	1	-1		1	-1	1	0	-1	0	-1	1	-1	-1	-1	-1	0	0	-1	-1	-1	1	-1	0	0	-1	-1	0	0		1	1
TCGA-55-8615-01	LUAD	23	11	12	2	0.180602	0.57	0.43	0.249398	0.249398	1.30699	2.6708	-1	1	1	0	-1	-1	-1		1	-1	1	-1	1			1		-1	1	1		-1	1		-1		-1	-1			1		0		1	1
TCGA-55-8616-01	LUAD	22	16	6	1	0.289043	0.39	0.61	0.320957	0.320957	3.51882	12.0396	0	1	1		-1	-1	-1	-1	1	-1	0		1	0	-1	1	0	0	0	0	0	1	-1	-1	-1	0	-1	-1	-1	0		-1	-1	-1		-1	0
TCGA-55-8619-01	LUAD	1	0	1	0	0.512447	0.24	0.76	0.247553	0.247553	0.141131	0.564524	0	1	0	0	0	0	0	0	0	0	0	0	0	0	0	0	0	0	0	0	0		0	0	0	0	0	0	0	0	0	0	0	0	0	0	0
TCGA-55-8620-01	LUAD	15	0	15	1	0.215306	0.62	0.38	0.164694	0.164694	3.79794	12.1131	0	0	0	1	0		0	0	1	0	1	1		1	1	1	1	1		0	1	0	0	0		0	0	1	0		1	0		1	1	0	1
TCGA-55-8621-01	LUAD	1	0	1	0	0.411316	0.2	0.8	0.388684	0.388684	0.45951	1.55085	0	0	0	0	0	0	0	0	0	0	0	0	0	0	0	1	0	0	0	0	0	0	0	0	0	0	0	0	0	0	0	0	0	0	0	0	0
TCGA-55-A48X-01	LUAD	13	12	1	0	0.460256	0.28	0.72	0.259744	0.259744	2.65438	10.0444	0	1	0	0	-1	0	0	0		0	0	-1	0	0	0	0	-1	0	-1	-1	0	0	-1	-1	0	0	-1	0	-1	-1	0	0	0	-1	-1	0	0
TCGA-55-A48Y-01	LUAD	6	3	3	0	0.413317	0.36	0.64	0.226683	0.226683	2.53609	8.72534		1	0	0	0	0	0		1	-1	0	-1	1	0			0	0	0	0	0	0	0	0	0	0	0	0	0	-1	0	0	0			0	0
TCGA-55-A48Z-01	LUAD	17	10	7	1	0.276075	0.41	0.59	0.313925	0.313925	0.434285	1.216		1	0	0		-1	-1	-1		0	0	0	1	0		1	0	0	0	0	0	0	-1	-1			-1		-1	-1	1	-1	-1	0		1	1
TCGA-55-A490-01	LUAD	18	7	11	1	0.216741	0.58	0.42	0.203259	0.203259	10.4167	35.3667	0			0		1			1	0	1		0	1	-1	1	-1	0			-1		1	1	-1	1	-1	1	-1	0	1	1	-1	0	0	0
TCGA-55-A491-01	LUAD	26	20	6	1	0.325772	0.45	0.55	0.224228	0.224228	3.07284	9.88786	-1		0		-1	1	-1	-1	1	-1	0	-1		-1	-1	1	-1	-1	1		0	0	-1		-1	-1	-1	-1	-1	-1	1	-1	-1	0			0
TCGA-55-A492-01	LUAD	12	9	3	1	0.134565	0.54	0.46	0.325435	0.325435	2.67095	7.61374	-1	1	0	0	-1	-1	1	-1	0	-1	0	0	0	1	0	0	-1	-1	0	0		0	0	0		0	0	0	0	0	0	-1	-1			0	0
TCGA-55-A493-01	LUAD	16	14	2	0	0.529251	0.26	0.74	0.210749	0.210749	2.42467	6.75877	0	0	0	0	-1		0	0		0	0	0	1	1	-1		-1	-1	-1	-1	0	0	0	0	-1		-1	0	-1	-1	0	-1	-1	-1			0
TCGA-55-A494-01	LUAD	28	21	7	1	0.0482823	0.81	0.19	0.141718	0.141718	1.64113	5.81593	-1	1	1	0	-1	-1	-1	-1	0	-1	0	-1	1	1	1	1	-1	-1	-1	-1	0	0	1		-1	-1	-1	-1	-1	-1		0	0	-1	-1	0
TCGA-55-A4DF-01	LUAD	13	6	7	1	0.331283	0.42	0.58	0.248717	0.248717	6.28872	18.6642		1	0	0	-1			-1	1	0	0	0	0	0		0	1		0	-1	1		1		0		-1	0		0	0					1	1
TCGA-55-A4DG-01	LUAD	22	17	5	2	0.276732	0.41	0.59	0.313268	0.313268	4.72033	18.4245	0	1	0		-1	-1	-1		1	-1	0	0	1	-1	-1	1	-1	-1	1	-1	-1		-1	-1	-1	0	-1	0	0	0	0	0		-1	-1	0	0
TCGA-55-A57B-01	LUAD	21	8	13	0	0.272613	0.21	0.79	0.517387	0.517387	0.217393	1.11802	1	1	1	1	0	0	1	1	-1	-1	0	0	1				-1	-1	-1	-1		1	0	0	0	1	0	1		0	1	-1	-1	0	0	0	0
TCGA-62-8394-01	LUAD	17	11	6	1	0.206656	0.53	0.47	0.263344	0.263344	1.11587	3.00426		0	0	0	-1		-1	-1	1	-1	0	1	1	1	-1	-1	0	0	-1	-1	0		0	0			-1		-1		1	0		-1		1
TCGA-62-8395-01	LUAD	6	4	2	0	0.155467	0.65	0.35	0.194533	0.194533	0.551235	1.94383	0	0	0	0	0		0	0	1		0	-1	0	0	-1	1	-1		0	0	0		0	0	-1	0	0	0	0	0	0	0	0	0		0	0
TCGA-62-8397-01	LUAD	23	5	18	1	0.125877	0.69	0.31	0.184123	0.184123	0.263001	0.701337	1	1	0	0	0	0	1	1	1	1	1	1	1	1		1	0	0	1	1	0	0	1	1	-1	1		0	0	-1		0		-1	-1	-1
TCGA-62-8398-01	LUAD	24	7	17	1	0.2164	0.5	0.5	0.2836	0.2836	0.694488	2.08347	-1	1	0	0	0	0	0	0		-1	0	-1	0	0	1	1	-1	-1	1	1	1		1	1	-1	0	1	1	1	1	1	0	0	-1	0	1	1
TCGA-62-8399-01	LUAD	13	1	12	1	0.212847	0.5	0.5	0.287153	0.287153	3.96275	12.8933	1	1		0	0	0	0	0	1		1	0	1	1	0	0	-1			0		1	0	0	0	0	0	0	0	0	0	1	1			1	1
TCGA-62-8402-01	LUAD	31	12	19	2	0.272187	0.5	0.5	0.227813	0.227813	0.636577	1.01274		0	1	1	0		1	1	1	-1		-1		-1	-1	1	-1	-1	-1	-1	1	1	1	1	1	0	1	-1	1	0	1	1	1	-1	-1	1	1
TCGA-62-A46O-01	LUAD	14	12	2	1	0.081542	0.82	0.18	0.098458	0.098458	7.45758	23.8705					-1		1	-1	0		0		0		-1	1	-1	-1	0				0		-1		0		-1	-1	0	-1	-1	-1		-1
TCGA-62-A46P-01	LUAD	6	0	6	0	0.13678	0.7	0.3	0.16322	0.16322	1.95148	7.25707	0	1	0	0	0		0	0	0	0	0		1		1	1	0	0	0	0	0	0	0	0	0	0	0	0	0	0	0	0	0		0	1	1
TCGA-62-A46R-01	LUAD	24	16	8	1	0.315831	0.42	0.58	0.264169	0.264169	1.03467	4.98521	0	1	0	1	-1	-1	0		0	-1	-1	-1	1	1	-1	1	1	-1	0	0	0	0	-1	-1	-1	0	-1	0	-1	-1	1	0	-1	-1	-1		0
TCGA-62-A46S-01	LUAD	17	11	6	1	0.236343	0.45	0.55	0.313657	0.313657	1.0181	3.08425		1	0	0	0	0	0	0	1	1	0	-1	0	0			0	0	1	1	-1	-1	-1	-1	0	-1	-1	1	0	-1		0	0	-1	0	0
TCGA-62-A46U-01	LUAD	16	13	3	1	0.423774	0.25	0.75	0.326226	0.326226	0.36576	1.12776	-1	0	0	0	0	0	1	-1	1	1		-1	0	0	-1	0	0	0	0		0	0	0	0		-1	0		-1	-1		-1	-1	-1	0	-1	-1
TCGA-62-A46V-01	LUAD	6	4	2	0	0.218921	0.52	0.48	0.261079	0.261079	0.472746	1.38869		1	0	0	0	0	0		0		1	-1	0	0	0	0		-1	0	0	0	0			-1	0	0	-1		0	0	0	0	0			0
TCGA-62-A46Y-01	LUAD	6	3	3	0	0.320683	0.48	0.52	0.199317	0.199317	0.226623	0.934819	0	0	0	0	0	0	0	0	1	0	0		1	1	0	0	0	0	0	0	0	0		-1	0	0	0	0	0	0	0	0	0	0	0	-1	0
TCGA-62-A470-01	LUAD	23	11	12	1	0.170962	0.59	0.41	0.239038	0.239038	0.943645	2.91672		1	0	0	-1	-1	0		1	-1	1	-1	0	0	1	1	1	-1	1	1	1		1	1		0	0	0	-1		1	-1	-1	-1	-1	0	0
TCGA-62-A471-01	LUAD	24	13	11	1	0.281888	0.46	0.54	0.258112	0.258112	1.10441	2.567	0	1	0		-1	0	1	1	1	-1	1	1	-1	0	1	1	-1	0	0	0	-1	0	1	1	-1	-1	0	-1	-1	0	1		-1	-1		-1
TCGA-62-A472-01	LUAD	21	18	3	1	0.280934	0.4	0.6	0.319066	0.319066	0.593981	1.59437	-1	0	0	0	0	0	-1	-1	0	0	-1	-1	1	1	-1	1	-1	0	0	0	-1	-1	0	0	-1	0	-1	-1		-1	0	-1	-1			-1	-1
TCGA-64-1676-01	LUAD	16	14	2	0	0.398987	0.51	0.49	0.0910128	0.0910128	4.30406	14.7126	0	1		0	-1	0	0	0	0	-1			0	0	-1			-1	0	-1	-1	0	-1		-1	0	-1	0	1	-1	0	0		-1	-1	-1
TCGA-64-1677-01	LUAD	21	14	7	1	0.477485	0.32	0.68	0.202515	0.202515	1.87243	5.74213		0	0				-1	-1	0	0	1	-1		0	-1	1	-1	-1	0	0			0	0	-1	1	-1	-1	-1	0	0	1	1	-1	-1	1	1
TCGA-64-1678-01	LUAD	12	6	6	1	0.241163	0.57	0.43	0.188837	0.188837				0	1		-1	-1	0	0			0	-1		0	-1		-1	0	1	0	0		1	1	-1			0	0	0		0	1
TCGA-64-1679-01	LUAD	25	9	16	1	0.33551	0.26	0.74	0.40449	0.40449	3.58711	13.3321	1	1	1			1	1	-1	1		1	1	1	1	-1		-1	-1	0	0	0	0	1	1	-1	0	0	1	-1	-1	0	1	-1	0		1	1
TCGA-64-1680-01	LUAD	18	2	16	1	0.147831	0.61	0.39	0.242169	0.242169	0.461878	1.4145	0	1	1	1	0	0	1	1	1	1	1		1	1	1	1	-1	0	0	0	0	0	0	0	1	-1	0	1	0	0	1	0	0	0	0	0	0
TCGA-64-1681-01	LUAD	26	20	6	2	0.294435	0.31	0.69	0.395565	0.395565	0.629611	1.91881	1	1	-1	-1	-1			-1		-1	0	0	1	1	-1	0	-1	-1	-1	-1		-1	-1	0	-1	0	-1	1		-1	0	-1	-1	-1	-1		1
TCGA-64-5774-01	LUAD	19	13	6	1	0.150211	0.76	0.24	0.0897887	0.0897887	1.16596	3.74335	-1	1	1	0	-1	-1		0	1		0	-1	0				0	-1		-1	-1		0	0		1	-1		-1	-1	1	0	0	-1	0		1
TCGA-64-5775-01	LUAD	14	4	10	1	0.145016	0.71	0.29	0.144984	0.144984	3.91075	12.7792		0	0	0	1	0	0	0	0	1	0		0	0	-1	1	1	0	-1	1	1	1	1	0		1	0	0	0	0	0	1	-1	0		0	0
TCGA-64-5778-01	LUAD	10	9	1	0	0.31632	0.59	0.41	0.0936805	0.0936805	3.40245	12.8056	0	0	0	0	0	0	0	-1	1		0	0	0	0	-1	0	0	0	0		0	-1	-1	-1			0	0	-1		0	0	-1	-1		0	0
TCGA-64-5779-01	LUAD	19	12	7	1	0.32002	0.44	0.56	0.23998	0.23998	2.90942	9.40919		0		0	-1	0			-1	-1	1	-1	1	-1	1	1	0	-1	-1	-1	0	1	0	1	-1			-1			0	0	1	-1	0	0
TCGA-64-5781-01	LUAD	11	8	3	0	0.411735	0.38	0.62	0.208265	0.208265	9.38677	30.4131	0	0	0	0	-1		0	0	0	0	-1	-1	1	1	0	0		0	0	0		0	0	0	-1	0	0	0	0	0	0	-1	-1	0	1	-1	0
TCGA-64-5815-01	LUAD	8	6	2	0	0.300375	0.35	0.65	0.349625	0.349625	1.50256	4.01705		1	0	0		1		0	0		0	-1	0	0	-1	0	-1	0	0	0	0		0	0	0		0	0	0	-1		-1	-1	0	0	0	0
TCGA-67-3770-01	LUAD	16	15	1	0	#N/A	#N/A	#N/A	#N/A	#N/A	1.6129	5.06117		0			0	0	0	0	1	0	0	0	0	-1	-1		-1	-1	-1	-1	0	0	-1	0	-1	0	-1	0	-1	-1	0	0	-1	-1	-1		-1
TCGA-67-3771-01	LUAD	21	15	6	1	0.349555	0.46	0.54	0.190445	0.190445	8.59027	27.2688		1	0	1	-1		-1	-1	-1	-1	0	-1	1	-1	-1	0	-1	-1	0	0			-1	0	1			-1	-1	-1		-1			0	1	1
TCGA-67-3772-01	LUAD	10	7	3	0	0.367486	0.45	0.55	0.182514	0.182514	0.525613	1.70824		1	0	0	-1	-1	0	0	-1	-1	0	0	0	0	-1	0		-1	0	0	0	0	0	0	0	0	0	1	0	-1	1	0		0	0	0	0
TCGA-67-3773-01	LUAD	5	4	1	0	0.185077	0.7	0.3	0.114923	0.114923	0.559397	2.54526	0	0	0	0	0	0	0	0	1	0		-1	0	0	0	0	0	0	0	0	0	0	0	0	0		0	0	0	-1	0	0	0	0	0	-1	-1
TCGA-67-3774-01	LUAD	7	6	1	0	0.27448	0.48	0.52	0.24552	0.24552	0.960367	2.54215		1	0	0	0	0	0	0	0	0	0	0	-1	-1	0	0	-1	-1	0	0	0	0			0	-1	0	0	0	0	0	0	0	-1	0	0
TCGA-67-4679-01	LUAD	2	1	1	0	0.154595	0.71	0.29	0.135405	0.135405	2.13633	7.50768	0	1	0	0	0	0	0	0	0	0		-1	0	0	0	0	0		0	0	0	0	0	0	0		0		0	0	0	0	0	0	0	0	0
TCGA-67-6215-01	LUAD	7	0	7	0	0.149603	0.69	0.31	0.160397	0.160397	0.793191	2.95921	0	1	0	0	0	0	0	0	1	1		0	0	0	0	0	0	0	0	0	1	1	0	0	0	0	0	1			1	0	0	0	0	0
TCGA-67-6216-01	LUAD	2	2	0	0	0.331485	0.56	0.44	0.108515	0.108515	0.183621	0.918107	0	0	0	0	0	0	0	0	0	0	0	0	0	0	0	0	0	0	0	0	0	0	0	0	0	0	0	0	0	0	0	-1	0	0	0	-1
TCGA-67-6217-01	LUAD	22	14	8	2	0.348092	0.25	0.75	0.401908	0.401908	1.3947	5.06337	1	1			-1	0	0	0	1	1	0	0	1		-1		-1	-1	0	0	0	0	-1	-1	-1			1	1	-1		-1	-1	-1	0	-1	-1
TCGA-69-7760-01	LUAD	20	11	9	1	0.11622	0.65	0.35	0.23378	0.23378	0.745129	1.73863		1	0		1	1	0	0	1	1		-1	1	0	-1	1	-1	-1	0	0	0	0	0		-1	-1	0	1		-1	1	0	-1		-1	0	0
TCGA-69-7761-01	LUAD	15	13	2	1	0.468105	0.23	0.77	0.301895	0.301895	0.195742	0.750344	-1	1	-1		-1	-1	0	0	0	0	0	0	0	0	0	0	-1	-1	0	0	0	0	0	0	-1	-1	0	0	0	-1	0	0	0	-1	0	-1	1
TCGA-69-7763-01	LUAD	24	18	6	1	0.227251	0.35	0.65	0.422749	0.422749	0.821386	1.73755			0	0	-1	-1	-1	-1	0	0	1	-1			1	1	-1	-1	1	1	-1	-1	-1	-1	0	0	-1	-1	-1	-1	-1	0	0	-1	1
TCGA-69-7764-01	LUAD	8	7	1	0	0.162911	0.8	0.2	0.037089	0.037089	0.800058	2.24632	0	0	0	0	0	0	0	-1	1		0	-1	0	0	0	0	-1	0	0	0	0			0	-1	0	-1	0	0	-1		0	0			0	0
TCGA-69-7765-01	LUAD	9	5	4	0	0.352871	0.41	0.59	0.237129	0.237129	5.44235	16.1094	0	1	0	0	0	0	0	0	1	-1	0	0	1	1	0	0	0	0	0	0			0	0	0	-1	0	0	0	-1	0	-1	-1	0	0	0	0
TCGA-69-7973-01	LUAD	23	7	16	1	0.188759	0.55	0.45	0.261241	0.261241	1.9898	6.97961	-1	1	1		-1	0	-1	-1	1	0	0	-1	0	0	1	1	1	-1		0	1	1	1	1	0	1			0	1	1	1	1	-1	1	0
TCGA-69-7974-01	LUAD	21	18	3	2	0.319967	0.29	0.71	0.390033	0.390033	3.66277	13.5916	-1	-1	0	0	0	-1	-1	-1				-1	1		0	0	-1	-1	-1	-1		1			-1			-1	-1	-1	1	-1	-1	0	0	-1	0
TCGA-69-7978-01	LUAD	16	9	7	1	0.491266	0.2	0.8	0.308734	0.308734	5.30544	15.3468		0		1	-1	1	0	0	0	0	0	-1	1	1	-1		0	0	0	-1	0	0	0		-1	0	-1	0	-1	-1	1	0				1	1
TCGA-69-7979-01	LUAD	23	17	6	2	0.146615	0.53	0.47	0.323385	0.323385	10.6492	38.5197	-1	1			-1	1		-1		-1	1	-1		1	-1		1	0	0	-1		0	-1		-1		-1	-1	-1	-1	-1		-1			0	1
TCGA-69-7980-01	LUAD	22	15	7	2	0.198469	0.55	0.45	0.251531	0.251531	6.3263	21.1992			1		-1	1	1		-1	-1		-1		-1	-1	-1		-1	-1	-1		-1	1		-1	-1			0		0	1	0		1	1	0
TCGA-69-8253-01	LUAD	16	5	11	1	0.223787	0.39	0.61	0.386213	0.386213	1.49889	3.52679	0	1	0	0	-1	-1	0	0	1	1		-1	0	0	0	0	1	1	0	0	0	0	-1	-1	1	0	0	0	0	0	0	1	1		1	1
TCGA-69-8254-01	LUAD	1	1	0	0	0.282357	0.41	0.59	0.307643	0.307643	0.412971	2.09435	0	0	0	0		0	0	0	0	0	0		0	0	0	0	0	0	0	0	0	0	0	0	0	0	0	0	0	0	0	0	-1	0	0	0	0
TCGA-69-8255-01	LUAD	20	11	9	1	0.422948	0.37	0.63	0.207052	0.207052	2.07313	7.67057	0	1	1	1	0		0	-1		0	1	0	1		-1	1	-1	-1	0	-1	0			1	-1	0	1	-1	-1	-1		0	0	-1		0	1
TCGA-69-8453-01	LUAD	6	6	0	1	0.341746	0.56	0.44	0.0982539	0.0982539			0	0	0	0	0	0	0	0	0	0	0	0	0	0	-1	0	-1		0	0	0	-1	0	0	0	0	0	0	0	-1	0	0	-1	0	0	0	0
TCGA-71-6725-01	LUAD	21	17	4	1	0.248399	0.63	0.37	0.121601	0.121601	0.471449	1.29648	0	1	-1	-1			-1	-1		-1			1	1	-1		-1	-1				1	-1	-1	-1	0	0			-1		-1	0	-1	-1	-1
TCGA-73-4658-01	LUAD	8	3	5	0	0.388599	0.29	0.71	0.321401	0.321401	2.69577	8.79828	0	1	0	0	0	0	0	0	1	0	0	-1	1	1	0	0	0	0	0	0	0	0	0		-1	0	0		-1	0	1	0	0	0	0	0	0
TCGA-73-4659-01	LUAD	24	21	3	1	0.249554	0.33	0.67	0.420446	0.420446	1.69842	5.27405	-1	1	-1	-1	-1	-1	-1	-1	0	0	-1	-1	-1	1	-1		0	-1	-1	0	-1	0	0	0	-1	1	-1	0	0	-1	0	0	0	-1	-1	0	0
TCGA-73-4662-01	LUAD	14	9	5	1	0.301014	0.48	0.52	0.218986	0.218986	1.53426	5.74594		1	0	0	0	-1		-1	0	0	1	0	1		-1	0	-1	0	0		1			0	-1	-1	-1	0	-1		1		0	0
TCGA-73-4666-01	LUAD	22	11	11	1	0.334216	0.45	0.55	0.215784	0.215784	3.05984	9.44179	-1	1	0	0	-1	1	0	0	0	0	1	-1	0	1	0	0			-1	-1	0	1	1	1		1	-1	0	0	1	1	-1	-1	-1	-1	-1	1
TCGA-73-4668-01	LUAD	24	12	12	1	0.220254	0.53	0.47	0.249746	0.249746	3.19245	13.1471		1		0	-1			0	1	-1	1	0		0	-1	0	-1	-1	1	-1	0	1		0	-1	0	-1	1	1	-1	1	1	1	-1	0	1	1
TCGA-73-4670-01	LUAD	26	17	9	1	0.181372	0.62	0.38	0.198628	0.198628	2.45864	8.85111	-1	1	0	0	-1	0	-1	-1		-1	1		1	1	-1	1	-1	-1	1	1	-1	0	1	-1	0	0	1		0	-1	0	-1	-1	-1	-1	-1	0
TCGA-73-4675-01	LUAD	24	3	21	1	0.133261	0.57	0.43	0.296739	0.296739	0.714646	1.72706	0	1	1	1			0	0	1	1	-1	-1	1	1	1	1	0		0	1	0	0	1	1	-1	0	0	1	0	1	1	1	1	1	1	1
TCGA-73-4676-01	LUAD	9	0	9	0	0.188101	0.77	0.23	0.0418987	0.0418987	0.842918	2.46631			1	0	0	1	0	0	1	0	0	0	1	1	1	1	0	0	0	0	0	1	0	0	0	0	0	0	0	0	1		0	0	0	0	0
TCGA-73-4677-01	LUAD	14	5	9	1	0.175736	0.47	0.53	0.354264	0.354264	1.71053	6.26228	-1	1	0	0	0	0	0	0	0	0	1		0	0	1	1	0	0	1	1	0	0	-1	-1	1	1	0	0	0	0	0	0	0	-1	-1	0	0
TCGA-73-7498-01	LUAD	7	4	3	0	0.181805	0.62	0.38	0.198195	0.198195	0.984445	2.74451	0	1	0	0	0	0	0	0	0	0	1	-1	0	0	-1	1	0	0	0	0	0	0	0	0	0	0	0	0	0	0	0	0		-1	-1	0	0
TCGA-73-7499-01	LUAD	23	14	9	1	0.323129	0.38	0.62	0.296871	0.296871	0.36329	1.7559	0	1	0	-1	-1	1	0	0	1	0	1	-1	1		-1	1	-1		0		-1	-1		0	-1		-1	0	0	-1	1	-1	-1	-1	-1		1
TCGA-73-A9RS-01	LUAD	18	14	4	1	0.193126	0.61	0.39	0.196874	0.196874	7.7009	25.4505	-1	1			-1					-1	0	-1	1	0	-1		-1	-1	1	-1	-1		0		0					-1	-1	-1	-1		0	1	0
TCGA-75-5122-01	LUAD	9	7	2	0	0.537361	0.32	0.68	0.142639	0.142639	1.32482	3.04105	0		0	0	0	0	0	0		0	0	0	1	0	-1	0	-1		-1	-1	0	0			0	0	-1	1	0	-1	-1	0	0		0	0	0
TCGA-75-5125-01	LUAD	20	16	4	2	0.368868	0.31	0.69	0.321132	0.321132	1.42956	4.59944		0	0		0	0	0			-1			1	1	-1		0	0	0	-1	-1	0	1	1	-1	-1	-1	0	-1	-1	0	-1	-1	-1	0	-1	-1
TCGA-75-5126-01	LUAD	7	1	6	0	0.47382	0.24	0.76	0.28618	0.28618	5.14355	16.0963	0	0	0	0	0	0	0	0	0	0	0	0	1	1		0	1	0	0	0	0	0	1	1		0	0	0	0	0	0	0	0	0	0	-1	1
TCGA-75-5146-01	LUAD	9	7	2	0	0.270856	0.58	0.42	0.149144	0.149144	1.58511	5.09063	0	0	0	0	-1	-1	1		1	-1	0	0	-1		0	0	0	-1	0	0	0	0	0	0		-1	0	0	0	0	0	0	0		0	0	-1
TCGA-75-5147-01	LUAD	15	7	8	1	0.306669	0.4	0.6	0.293331	0.293331	0.213465	1.12832		1		0	-1	1	1	1	1		0	0	0	0	-1	1	0	0	0	0		0		0	-1		0	0	0	-1	0	1	-1	-1		0	0
TCGA-75-6203-01	LUAD	10	0	10	0	0.352845	0.26	0.74	0.387155	0.387155	0.153385	0.306771	0	0	0	0	0	0	0	0	1	1	0	0	1	1	0	0	0	0	0	0	1	1	0		0	1	0	1	1	0	0	0	0	0	0	0
TCGA-75-6205-01	LUAD	24	9	15	0	0.587876	0.27	0.73	0.142124	0.142124	0.307386	1.29102	1	1	1	1	0	0		1	1	1	0	0	1	1	-1		0	0	0	0	1	1	1	1	-1	1	-1	0	0	-1	0	-1	-1	0	1	-1	-1
TCGA-75-6206-01	LUAD	16	5	11	1	0.122679	0.7	0.3	0.177321	0.177321	0.552864	2.42646		1	0	1	0	0	0	0	0	0	1	-1	0	0	1	1	0	0	1	1	0	0	0	0	-1	-1	0	1	1	-1	0	0	0	-1	0	1	1
TCGA-75-6207-01	LUAD	11	9	2	0	0.153495	0.64	0.36	0.206505	0.206505	0.518582	1.67777			0		-1	0	0	0		0	0	-1	1	1	-1			0	0	0	0	0	0	0		0	-1	0	-1	-1	0	-1	-1			-1	0
TCGA-75-6211-01	LUAD	17	7	10	1	0.322395	0.39	0.61	0.287605	0.287605	2.52809	9.86267		1		1	-1	-1		-1	1	-1				1	0		-1		0	0	0				-1		0	0	1		1	1	1	-1	1
TCGA-75-6212-01	LUAD	19	16	3	1	0.351746	0.43	0.57	0.218254	0.218254	0.180616	0.481643	0	0	0	0	0	0	0	0	0	0	0	0	0	0	-1	-1	-1	-1	-1	-1	0	0	0	0	-1	1	-1	0	0	-1	-1	-1	-1	-1	-1	-1	-1
TCGA-75-6214-01	LUAD	21	15	6	1	0.223069	0.64	0.36	0.136931	0.136931	5.14546	17.8376		0	1	1	-1		0		0		0	-1	1	-1	-1		0	0	0	0	-1	-1		-1	1	-1	-1	0	-1	-1			-1	-1		-1	1
TCGA-75-7025-01	LUAD	19	16	3	1	0.269911	0.34	0.66	0.390089	0.390089	0.361221	0.752543		0	0	0	0	0	0	0	0	0	-1	-1	1	-1	-1	-1	-1	-1	0	0	-1	-1	0	0	0	0	-1	1	1	-1	-1	-1	-1	-1	-1	0	0
TCGA-75-7027-01	LUAD	23	13	10	1	0.162971	0.62	0.38	0.217029	0.217029	2.09786	5.59428	-1	1	1	1	-1	-1	1	-1	0	-1	0	-1	0	0	1	1	-1	-1	0	0	0	0	1	1	1	-1	0	0	1	0	0	-1	-1	0	0	0	0
TCGA-75-7031-01	LUAD	18	13	5	1	0.273798	0.49	0.51	0.236202	0.236202	1.8932	5.20631	-1	1	-1		-1	-1	0	-1	1		0	0					-1	1	0	-1	0	0	0	0	-1	1		0		-1			-1	-1	-1	1
TCGA-78-7143-01	LUAD	26	20	6	2	0.190715	0.52	0.48	0.289285	0.289285				0	-1	-1		1		1	1	0	-1	-1	1	0	-1	0	-1	-1	-1	-1	-1	-1	0			-1	-1		-1	-1	1	1		-1	-1	-1
TCGA-78-7145-01	LUAD	20	9	11	1	0.116128	0.63	0.37	0.253872	0.253872	1.5116	4.98827		1	1	0	1	1	1	0		0	0	0	1	1			-1		0	0	-1	-1		1	-1	1	-1	0	1		1	0	-1	-1		-1	0
TCGA-78-7146-01	LUAD	17	15	2	1	0.155634	0.68	0.32	0.164366	0.164366	2.98436	9.31483	-1	-1	0	0	-1	1	0	0	0	-1	0	-1	0	-1		1			0	0		0	0	0	-1	-1		0	-1	-1		-1	-1	-1	-1
TCGA-78-7147-01	LUAD	21	9	12	1	0.17666	0.62	0.38	0.20334	0.20334	3.21071	8.54171	1	1	0	0	-1	1	0		1	1	1	0	1	1			-1	-1	0	-1		1	-1	0	-1			0	0	-1	1	1	-1	-1	0	0	0
TCGA-78-7148-01	LUAD	6	6	0	0	0.157546	0.6	0.4	0.242454	0.242454	1.61075	5.93591	-1	0	0	0	-1	-1	0	0	0	0	0	0	0	0	0	0	-1	-1	0	0	0		0	0	0	0	0	0	0	0	0	0	0	-1	0	0	0
TCGA-78-7149-01	LUAD	21	6	15	1	0.133778	0.6	0.4	0.266222	0.266222	1.13567	3.72734	1	1	1	1	0	0		0	1	-1	1	-1	0	0	1	1	-1	-1	1	1	0	0	0	0	1	1	1		0	1	1	0	0	-1	-1	0	0
TCGA-78-7150-01	LUAD	15	9	6	1	0.185561	0.46	0.54	0.354439	0.354439	3.65663	10.3159	0	1			-1		1		0	-1			1		-1	0	-1	-1		0	0				0		0		-1	-1	0	1	-1	-1	1	0	0
TCGA-78-7152-01	LUAD	6	3	3	0	0.315427	0.55	0.45	0.134573	0.134573	1.57813	4.677	0		0	0	0		0	0	0	0	0	-1	0	0	-1	1	0	0	0	0	0	0	0	0	0	0	0	1	-1	0	0	0	0	0	0	1
TCGA-78-7153-01	LUAD	16	11	5	1	0.168491	0.57	0.43	0.261509	0.261509	0.916322	3.01499	0	1	-1	-1	0	0	0	0	1	1	-1	-1	0	0	-1		0	0	1	1	0	0	-1	-1	0	0	-1	0	0	0	0	0	0	-1	-1	0	0
TCGA-78-7154-01	LUAD	22	16	6	2	0.165184	0.5	0.5	0.334816	0.334816	2.73655	5.62182	-1	0			-1		0		1		-1	-1	1	-1	0		-1	-1	1	-1	-1		1	-1	-1	-1		0	1	-1		-1	-1	0	0	0	1
TCGA-78-7155-01	LUAD	18	16	2	1	0.107861	0.82	0.18	0.0721391	0.0721391	10.4112	41.5837	0					0	0	-1	1	-1		-1		-1	-1	-1	-1	-1		-1	-1	0		-1			-1	-1	-1			0	-1	-1		1	0
TCGA-78-7156-01	LUAD	4	2	2	0	0.0486691	0.8	0.2	0.151331	0.151331	1.82001	7.71467	0	1	0	0	0	0	0	0	0	0	0	-1	0	0	0	0	-1	0	0	0	0	0	0	0	0	0	0	1	0	0		0	0			0	0
TCGA-78-7158-01	LUAD	4	1	3	0	0.0506267	0.9	0.1	0.0493733	0.0493733	1.56051	6.39504	0	1	0	0	0	0	0	0	0	0	1	-1	0	0		1	0	0	0	0	0	0	0	0	0	0	0	0	0	0	0	0	0	0	0	0	0
TCGA-78-7159-01	LUAD	22	18	4	1	0.300493	0.29	0.71	0.409507	0.409507	2.55915	7.97853	-1	1	0	0	-1	0	-1	-1	1	-1		-1	0	0	-1	1	-1	-1	0	0	-1	-1	0	-1	0	1			-1	-1		-1	-1		-1		0
TCGA-78-7160-01	LUAD	16	15	1	0	0.431732	0.29	0.71	0.278268	0.278268	0.541568	1.02296	-1	1	0	0	-1	-1	0	0	0	-1	-1	-1	0	0	0	0	-1	0	0	0	-1	-1	-1	-1	-1	0	0	0	0	0	0	-1	-1		0		-1
TCGA-78-7161-01	LUAD	9	2	7	1	0.0618421	0.75	0.25	0.188158	0.188158	1.79335	4.80252		1	1	1				0	0	-1			1	0	0				1		0				-1	1		0		0	1			0		0
TCGA-78-7162-01	LUAD	5	2	3	0	0.331893	0.27	0.73	0.398107	0.398107	0.738285	1.94907	1	1	0		0	0	0	0	0	0	1	-1	0	0	0	0	0	0	0	0	0	0	0	0	0	0	0	0	0	0	0	0	0	-1		0	0
TCGA-78-7163-01	LUAD	27	21	6	1	0.189799	0.68	0.32	0.130201	0.130201	0.210656	0.57178		-1		0	-1	-1			1	1	-1	-1	0		-1	-1	0	0	-1	-1	1	1	-1	-1	-1	-1	-1	1	1	-1	-1	-1	-1	-1	-1	0	0
TCGA-78-7166-01	LUAD	3	2	1	0	0.247767	0.63	0.37	0.122233	0.122233	1.97178	5.47389	0		0	0	0		0	0	1	0	0	0	0	0	0		-1	0	0	0	0	0	0	0	0	0	0	0	0	0	0	0	0	-1	0	0	0
TCGA-78-7167-01	LUAD	17	15	2	1	0.0500679	0.84	0.16	0.109932	0.109932	1.09592	2.81385		1	0	1	-1	-1	0	-1	0	-1					-1		-1	-1		0	0	0	0		0	0	-1	-1	-1	0	0	-1	0	-1	-1	0	0
TCGA-78-7220-01	LUAD	28	21	7	1	0.162519	0.61	0.39	0.227481	0.227481	6.51001	20.8437	-1		-1	1	-1		1	-1	1	-1			-1	0	-1	0	-1	-1	-1	-1	-1	-1	1	1	0	-1	1	-1	-1	1	0	-1	-1	-1		0	0
TCGA-78-7535-01	LUAD	30	19	11	1	0.236498	0.6	0.4	0.163502	0.163502	1.74922	4.1507	1	1	0	0	-1	-1	1	-1	1	-1	-1	-1	1	0	1	1	0	0	0	-1		1	-1	-1	0	-1	-1	1	-1	-1		-1	-1	-1	-1	-1	1
TCGA-78-7536-01	LUAD	16	11	5	1	0.136024	0.78	0.22	0.0839756	0.0839756	4.9542	15.7495		1			-1		-1	-1	1			-1	0			1		0		0							-1	-1	-1	-1		0	-1	-1		1	1
TCGA-78-7537-01	LUAD	2	0	2	0	0.122849	0.74	0.26	0.137151	0.137151	0.848478	3.71575	0	1	0	0	0	0	0	0	0	0	0	0	0	0	0	0	0	0	0	0	0	0	0	0		0	0	0	0	0	0	0	0	0	0	1
TCGA-78-7539-01	LUAD	13	4	9	1	0.268871	0.52	0.48	0.211129	0.211129	3.92488	12.1941		1			0	-1	1		1	1	1	1		0			0	0	0	0	0		0	0	-1			0	0		1	1	-1	-1	0	0	0
TCGA-78-7540-01	LUAD	6	4	2	0	0.131993	0.59	0.41	0.278007	0.278007	0.344423	0.78278	0	0	0	0	0		0	0	0	0	0	-1	1	1	0	0	-1	0		-1	0	0	0	0	0	0		0	0	-1	0	0	0	0	0	0	0
TCGA-78-7542-01	LUAD	28	19	9	2	0.338636	0.35	0.65	0.311364	0.311364	3.13907	9.29764		0	-1	-1	-1	-1	1	1	0	-1	0	-1	0	-1	-1	1	-1	1	1	-1	0		-1	-1	-1	-1	-1	0	1	-1		1	1	-1	-1	0	0
TCGA-78-7633-01	LUAD	9	2	7	0	0.0601323	0.75	0.25	0.189868	0.189868	0.905924	2.89896	0	1	1	1	0	0	0	0	1	1	1	-1	0	0	0	0	-1		1	0	0	0	0	0	0	0	0	0	0	0		0	0		0	0	0
TCGA-78-8640-01	LUAD	15	13	2	1	0.339756	0.35	0.65	0.310244	0.310244	5.34422	17.6991	0	1	0	0	-1		-1		1	-1	0		0		-1	0	-1	-1	-1	-1	-1		0				-1	0		-1	0	0					0
TCGA-78-8655-01	LUAD	10	4	6	1	0.226649	0.46	0.54	0.313351	0.313351	0.797444	2.56954		1	0	0	0	0	0	0	1	0	1	-1	1	1	0	0	-1	0	-1	-1	0	0		1	0	0	0	0	0			0	0		0	0	0
TCGA-78-8660-01	LUAD	8	7	1	0	0.462099	0.33	0.67	0.207901	0.207901	2.06535	6.02629	0		0		0	0	0	0	1	0	0		0	0	-1	0	-1	-1	0	0	0	0	0	0	0		0	0	0	-1	0	-1	-1	0	0		0
TCGA-78-8662-01	LUAD	19	13	6	1	0.0838214	0.79	0.21	0.126179	0.126179	8.92685	29.0566							-1	-1	1	-1	1		1		-1			-1	1	0	-1		-1	-1	-1				-1	0	0	1	-1	-1			-1
TCGA-80-5607-01	LUAD	3	1	2	0	0.307169	0.49	0.51	0.202831	0.202831	0.876217	3.2128	0	0	0	0	0	0	0	0	0	0		-1	0	0	1	1	0	0	0	0	0	0	0	0	0	0	0	0	0	0	0	0	0	0	0	0	0
TCGA-80-5608-01	LUAD	15	8	7	1	0.25635	0.48	0.52	0.26365	0.26365	1.38025	4.3508	-1	1		1	-1	-1	0	0	1	0	0		0	0	0	1	1	-1	1	0	0			0	0	1		0	0	-1	0	0	0	-1	0
TCGA-80-5611-01	LUAD	14	6	8	1	0.328183	0.51	0.49	0.161817	0.161817	1.45925	5.49548		1	0	0	0				1		0	0	1	0	-1			-1	1		0	0	-1	0		1	-1	0		-1	1	0					1
TCGA-83-5908-01	LUAD	15	14	1	0	0.437585	0.4	0.6	0.162415	0.162415	1.79575	6.04569	0	0	0	0	-1		0	0	1	-1		-1	0	0	-1		-1	-1	-1	-1	0	0		0	-1	0	0	0	0	-1	-1	-1	-1		0	0	0
TCGA-86-6562-01	LUAD	17	5	12	1	0.19517	0.46	0.54	0.34483	0.34483	0.390818	1.20252		1	1		-1	-1	0	0	1	-1	0	-1	1	1	0	0	0	0	0	0	0	0	1			1	-1	0	0	1	1	0	0	0	0		1
TCGA-86-6851-01	LUAD	18	8	10	1	0.444778	0.32	0.68	0.235222	0.235222	6.47407	23.6078	-1			1	-1	1	0	0	1	0	1	1	0	0	-1		0	0	0		1	1	1			0			-1	-1	1	-1	-1	0	0		1
TCGA-86-7701-01	LUAD	19	11	8	1	0.369573	0.42	0.58	0.210427	0.210427	1.55846	5.4546		1			-1		0	0	0	0	-1	-1	1		1	1	0	0	1	1	-1			1	-1	1		0	0	-1	-1		-1	-1	-1	0	0
TCGA-86-7711-01	LUAD	16	11	5	0	0.550371	0.33	0.67	0.119629	0.119629	2.17609	5.73138	0	1	1	0	-1	0	0	0	1	-1	0			0			-1	-1	1	0	-1	0	0	0	-1	-1	0	0	-1	-1	1	0	-1	-1	0	0	0
TCGA-86-7713-01	LUAD	14	11	3	1	0.12889	0.65	0.35	0.22111	0.22111	1.14595	4.13144		1	0	0			-1	-1	0	-1	0	-1	0	0	-1		-1		0	0	-1	-1	1	0	-1		0	0	-1			1		-1	0	0	0
TCGA-86-7714-01	LUAD	3	3	0	0	0.214316	0.67	0.33	0.115684	0.115684	0.761091	2.06129	0	0	0	0	0	0	0	0	0	0	0	-1	0	0	0	0	0	0	0	0	0	0	0	0	0	0	0	0	0	0	0	-1	-1	0	0	0	0
TCGA-86-7953-01	LUAD	24	12	12	1	0.424445	0.35	0.65	0.225555	0.225555	0.328998	1.31599	1	1	0	0	-1	1	1	1	1		-1	-1	1	1	-1	0		1	0	0				1	-1			1	-1	-1	1	0	0	-1		-1	-1
TCGA-86-7954-01	LUAD	27	11	16	2	0.394354	0.27	0.73	0.335646	0.335646	2.28937	5.35217	1	1	1		-1	0	0	0	1	1	1	1		1	-1	1		-1	0	0	1	1	1	1	-1	-1		1		-1	0	-1	-1	-1	-1	1	1
TCGA-86-7955-01	LUAD	22	11	11	1	0.116302	0.73	0.27	0.153698	0.153698	2.51792	8.06947	0	0	1	0	0	0	1		1	-1		-1	1	1	1	0	-1	-1	1	-1		1			-1		-1	1	0	-1		1		-1	-1	-1	1
TCGA-86-8054-01	LUAD	19	12	7	1	0.112387	0.74	0.26	0.147613	0.147613	1.50019	5.82073	-1	1	1	0	-1	-1	0		1	0		-1	0	0	-1	1	-1	0	-1	0	0	-1	0	0	-1		0	-1	-1			1			0	1	1
TCGA-86-8055-01	LUAD	20	15	5	2	0.310279	0.28	0.72	0.409721	0.409721	0.415458	1.06832	0	0	0	0	-1	0	-1	-1	1		-1	-1	1	0	-1		-1	-1	-1	-1	-1		-1	-1	-1			1	1	-1	0	1			0	0	0
TCGA-86-8056-01	LUAD	3	3	0	1	0.269073	0.37	0.63	0.360927	0.360927	2.01346	7.25437	0		0	0	0	0	0	0	0		0		0	0	0	0	-1	0	0	0	0	0	0	0	0	-1	0	0	0	-1		0	0	0	0	0	0
TCGA-86-8073-01	LUAD	9	8	1	0	0.324003	0.43	0.57	0.245997	0.245997	11.9278	38.0011	0	0	0	0	-1		0	0	1	-1	0	0	0	0	0		0	0	0	0	0	0	-1	0		0		-1	-1	-1	0	0	-1	-1		0	0
TCGA-86-8074-01	LUAD	18	12	6	2	0.184861	0.51	0.49	0.305139	0.305139	0.596046	1.85437	0	1	-1	-1		1			1	-1	1		1	0	-1		-1	0	-1	-1		-1	-1		0	1	-1	0	0	0	0	0		-1		0	0
TCGA-86-8075-01	LUAD	27	12	15	2	0.27326	0.3	0.7	0.42674	0.42674	0.424956	1.50369	1	1	0	0	-1		-1	-1	1	1	1		1	1	-1	0	-1		-1	-1	0	0		-1		1	-1	1	-1	-1	1	1		-1	1	1	1
TCGA-86-8076-01	LUAD	1	0	1	0	0.512386	0.24	0.76	0.247614	0.247614	0.487079	1.82654	0	1	0	0	0	0	0	0	0	0	0	0	0	0	0	0	0	0	0		0	0	0	0	0	0	0	0	0	0	0	0	0	0	0	0	0
TCGA-86-8278-01	LUAD	8	7	1	0	0.295999	0.56	0.44	0.144001	0.144001	0.86361	2.59083		0	0	0	-1	0	0	0	0	0	0	0	0	-1	0	0	0	0	-1	-1	0	0	0		0	0	0	1		-1	0	-1	-1	0	0		0
TCGA-86-8279-01	LUAD	28	16	12	2	0.177842	0.5	0.5	0.322158	0.322158	3.87842	13.0673	1	1	0	0	0	0	1	-1	1	-1	1	-1	1	0	-1	1	-1	-1	-1	0	0	1	-1		-1		-1	1	1	-1		-1	-1	-1	-1	0	1
TCGA-86-8280-01	LUAD	23	19	4	1	0.305174	0.45	0.55	0.244826	0.244826	0.28555	1.1422	1	1	-1	-1	-1	-1	-1	-1	0	0		-1	1	1	-1	0	-1	-1	-1	-1	0		0	-1	-1	0	0	0	0	-1	-1	-1	-1	-1	0
TCGA-86-8281-01	LUAD	3	1	2	0	0.275774	0.54	0.46	0.184226	0.184226	2.10369	6.42633	0	1	0	0	0	0	0	0	0	0	1	-1	0	0	0	0	0	0	0	0	0	0	0	0	0	0	0	0	0	0	0	0	0		0	0	0
TCGA-86-8358-01	LUAD	21	18	3	1	0.102282	0.72	0.28	0.177718	0.177718	8.28085	27.8213	-1		-1		-1	0	-1					-1	1		-1	1	-1	-1	0			-1			-1		-1	-1		-1		-1		-1		-1	-1
TCGA-86-8359-01	LUAD	16	9	7	1	0.338175	0.44	0.56	0.221825	0.221825	1.33454	3.97461	0	1		1	-1	0		0	1	-1	0	-1	1			1	0	0		-1			0		-1		-1	1	-1	0	0	1		0	0	0
TCGA-86-8585-01	LUAD	21	16	5	1	0.463755	0.29	0.71	0.246245	0.246245	3.75926	14.6131		1		-1	-1	-1	-1		1	-1	-1		0		-1	1	-1	-1		-1		0		0	-1	0	-1	0			0	1	-1	-1	1	0
TCGA-86-8668-01	LUAD	10	7	3	1	0.243743	0.41	0.59	0.346257	0.346257	0.23826	0.893473		0	0	0	0	0	0	0	0	0	0	0	1	-1	-1	0	-1	-1	0	0	0	0	0	0	-1	0	0	1	-1	-1	1	0	0	0	0	0	0
TCGA-86-8669-01	LUAD	20	15	5	1	0.197905	0.57	0.43	0.232095	0.232095	1.43872	3.35701	-1	0	0	0	-1	1	0	-1			0	0	-1	-1	-1	1			-1		-1	-1	1	1	-1			0			1	-1	-1	-1	-1	0
TCGA-86-8671-01	LUAD	0	0	0	0	0.56959	1	0	-0.56959	0	0.376982	0.869958	0	0	0	0	0	0	0	0	0	0	0	0	0	0	0	0	0	0	0	0	0	0	0	0	0	0	0	0	0	0	0	0	0	0	0	0	0
TCGA-86-8672-01	LUAD	21	16	5	1	0.418386	0.32	0.68	0.261614	0.261614	2.51177	7.13572		0	-1	0		0		-1	1		0	-1	-1	1	0	1	-1	-1	1	0			-1	0	1	-1	0	-1	-1	-1		-1	-1	-1	-1	0	0
TCGA-86-8673-01	LUAD	30	26	4	1	0.362458	0.4	0.6	0.237542	0.237542	3.72164	12.4442	-1	0	-1	0	-1	1			1	-1	-1	-1	1	1	-1	0	-1	-1		-1	-1		-1	-1	-1	-1	-1	-1	-1	-1		-1	-1	-1		-1	-1
TCGA-86-8674-01	LUAD	5	1	4	0	0.285843	0.58	0.42	0.134157	0.134157	2.41046	7.69604	0	1	0	0	0	0	0	0	0	0	1	-1	0	0	1	1	0	0	0	0	0	0	0	0	0	0	0	0	0	0	0	0	0		0	0	0
TCGA-86-A456-01	LUAD	8	8	0	0	0.350796	0.36	0.64	0.289204	0.289204	2.89443	9.25615	0	0	0	0	0	0	0		0	0	0	-1	0	0	-1	0			0	0	-1	0	0		-1	0	-1	0	0	-1	0	0	0	-1	-1	0	0
TCGA-86-A4D0-01	LUAD	10	7	3	0	0.146812	0.79	0.21	0.0631877	0.0631877	0	0		1	0	0		0	0	0	1	0	0	0		0	-1	1	0	0	0	0	-1		0	0	-1		-1	0	0	0	0	0	0	-1	-1	0	0
TCGA-86-A4JF-01	LUAD	18	16	2	1	0.354276	0.25	0.75	0.395724	0.395724	11.5847	33.349	-1	1	0	0	-1	0	-1	-1	0	0	0	0	0	0	-1	-1	-1	-1	1	-1	-1	-1	0	0	-1	0	-1			-1	0	0	0	0	0	0	0
TCGA-86-A4P7-01	LUAD	6	2	4	0	0.407103	0.19	0.81	0.402897	0.402897	0.354355	1.8013	0	1	0	0		0		0		0		-1	1	1			0	-1	0	0	1	0	0	0	0		0	0	0	0		0	0	0	0	0	0
TCGA-86-A4P8-01	LUAD	0	0	0	0	0.399092	0.46	0.54	0.140908	0.140908	0.0286599	0	0	0	0	0	0	0	0	0	0	0	0	0	0	0	0	0	0	0	0	0	0	0	0	0	0	0	0	0	0	0	0	0	0	0	0	0	0
TCGA-91-6828-01	LUAD	30	24	6	2	0.295857	0.37	0.63	0.334143	0.334143	1.56881	7.37921	-1	1	0	0	1	1	-1	-1	1	-1	0	0	-1	-1	-1	1	1	-1	-1	-1	-1	-1		-1	-1	0	-1	-1	-1	-1	0		-1	-1	-1	-1
TCGA-91-6829-01	LUAD	17	15	2	1	0.226545	0.49	0.51	0.283455	0.283455	4.53025	16.192	0		1	-1	-1		0	-1	1	-1		0		0	-1	0	-1	-1	0	-1	0	0	0	-1	-1				-1	-1		0	-1	-1		0
TCGA-91-6830-01	LUAD	11	10	1	0	0.323279	0.28	0.72	0.396721	0.396721	2.2368	5.97502	-1		0		-1	1	-1	-1	0	0	0	0	0	0	0	0	-1	-1	0	0	0	0	0	0	0	-1	0	0	0	0	0	-1	-1			0	0
TCGA-91-6831-01	LUAD	16	8	8	1	0.25301	0.5	0.5	0.24699	0.24699	1.93331	7.23525	1	1	1	0	-1	0		-1		-1	1	-1	1	0		1	1	-1		0	0		0		-1			0		-1	0	0		0	0	1	0
TCGA-91-6835-01	LUAD	13	8	5	0	0.506208	0.21	0.79	0.283792	0.283792	0.701134	2.19104	0	1	0	0	-1	0	0	0	0	0		0	1	1	0	0	-1	-1	-1	-1				0	-1	1	-1		-1		1	0	0	0			0
TCGA-91-6836-01	LUAD	20	8	12	1	0.206169	0.67	0.33	0.123831	0.123831	3.62843	12.125	0	0	1	1	0	0	1		1	0			0	1	-1	1	0	1	1	0				1	-1		-1	0	0	-1	1	-1	-1	-1		1	1
TCGA-91-6840-01	LUAD	21	14	7	1	0.186048	0.62	0.38	0.193952	0.193952	0.917053	3.06738	0	0		0	-1		-1	-1	1	-1		0	-1	-1	1	1	-1		-1		0	0	-1		-1	1	-1	0	0	-1		1	-1		1	1
TCGA-91-6847-01	LUAD	25	21	4	2	0.0727747	0.85	0.15	0.0772253	0.0772253	0.83349	1.66698	0	0	0		-1	-1	-1	-1	0	0	0	0		0	-1	1	-1	-1	0	-1	-1	-1	-1	-1		1	-1	-1	-1	-1		-1	-1	-1	-1	1	1
TCGA-91-6848-01	LUAD	15	2	13	2	0.368567	0.31	0.69	0.321433	0.321433	5.09285	15.6467		1		0			0	1		0	1		1	1				0	0	0	1	1	1	1		-1		1	1		1				0	-1	0
TCGA-91-6849-01	LUAD	4	3	1	0	0.25803	0.62	0.38	0.12197	0.12197	0.810712	2.73965	0	1	0	0	0	0	0	0	0	0	0	-1	0	0	0	0	-1	0	0	0	0				0	0	0	0	0	0	0	0	0	-1	0	0	0
TCGA-91-7771-01	LUAD	20	12	8	2	0.290921	0.32	0.68	0.389079	0.389079	1.53825	5.03703	-1	1		0	1				0	0	0	-1	0		1	1	0	-1	1	1	0	0	1					0	-1	-1	-1	-1	-1	-1	-1	0	1
TCGA-91-8496-01	LUAD	4	0	4	0	0.178633	0.5	0.5	0.321367	0.321367	0.280701	0.814032		1	0	0	0	0	0	0	0	0	0	0	1	1	0	0	0	0	0	0	0	0	0	0	0	1	0			0	0	0	0	0	0	0	0
TCGA-91-8497-01	LUAD	1	1	0	0	0.312204	0.45	0.55	0.237796	0.237796	0.433295	1.06879		0	0	0	0	-1	0	0	0	0	0	0	0	0	0	0		0	0	0	0	0	0	0	0		0		0	0	0	0	0		0	0	0
TCGA-91-8499-01	LUAD	16	9	7	1	0.136857	0.77	0.23	0.0931432	0.0931432	2.29968	7.62821				0	-1				1	-1	0		-1	0	-1	1		0	0	-1			1		-1	1	-1		-1	0	0	1		0		1	1
TCGA-91-A4BC-01	LUAD	24	21	3	1	0.490601	0.22	0.78	0.289399	0.289399	3.74566	11.6054	-1			-1	-1	-1	-1	-1	1	-1		-1	0	1				-1		-1		1	-1		-1		-1	-1	-1	0	-1	-1	-1	-1	-1	0	0
TCGA-91-A4BD-01	LUAD	6	4	2	0	0.260044	0.55	0.45	0.189956	0.189956	0.212263	0.485174	0	0	0	0	0	0	0	0	1	1	0	-1	0	0	-1	0	0	0	0	0	0	0	0	0	0	0	0	0	0	0	0	-1	-1	0	0	0	0
TCGA-93-7347-01	LUAD	6	4	2	0	0.490248	0.3	0.7	0.209752	0.209752	0.841142	2.97404	0	0	0	0	0	0	0	0	1	0	0	0	0	0		1	0	0	0	0	0	0	0	0	0		-1	0	0	-1	0	0	0	0	0	-1	-1
TCGA-93-7348-01	LUAD	12	7	5	0	0.406562	0.45	0.55	0.143438	0.143438	0.561686	2.54237		1	0	0	-1		0	0	1		-1	-1	1	1	0	0	-1	-1	0	0	0	0	0		0	0	-1	1	-1	0	0	0	0	0	0	0	0
TCGA-93-8067-01	LUAD	19	7	12	2	0.266696	0.32	0.68	0.413304	0.413304	4.41556	12.5345		1	0	1	0	1	0	0		-1	0		0	-1	-1	1			1	0		-1	1	1	-1	1	-1	1		-1	1	0		0	0	1	1
TCGA-93-A4JN-01	LUAD	25	20	5	1	0.304684	0.37	0.63	0.325316	0.325316	0.617948	2.0304		1	0	0	-1		-1	-1	-1	-1		-1			-1	-1	-1	-1	-1	0	-1	-1	-1	-1	-1	0	-1	0	0	-1	-1	1	1	0	0	1	1
TCGA-93-A4JO-01	LUAD	16	8	8	0	0.493245	0.2	0.8	0.306755	0.306755	0.314792	1.45949	0	1	0		0	0	-1	-1	1		0	0	1		0		0	-1	0	0	0	1	1	0	-1	-1	0	-1	-1	-1		1		0	0	1	1
TCGA-93-A4JP-01	LUAD	10	2	8	0	0.260141	0.27	0.73	0.469859	0.469859	0.524297	1.42725	0	1	0	0	0	0	0	0	1			0	1	0	0	1	0	0	-1	0	0	0		0	0	0	0	1	-1		0	0	0	0		1	1
TCGA-93-A4JQ-01	LUAD	21	16	5	1	0.511194	0.2	0.8	0.288806	0.288806	0.915889	2.89539	0	1					-1		1		0	-1	1		-1				-1			-1		1	-1		-1		-1	-1		1	-1	-1	-1	-1	-1
TCGA-95-7039-01	LUAD	19	13	6	2	0.194833	0.41	0.59	0.395167	0.395167	9.82332	34.3816		1			-1	-1			1	-1	0	0		1	-1	0	1	-1	0					-1		-1	-1	0	0	-1	1	-1	0	-1	-1		1
TCGA-95-7043-01	LUAD	15	11	4	2	0.105467	0.76	0.24	0.134533	0.134533	8.74154	31.3799	-1				-1	1	-1	-1	0	-1		-1	0		-1		0		-1	-1	1				0	0	0	0	0	0	1	0			1	-1	0
TCGA-95-7562-01	LUAD	27	22	5	2	0.201976	0.55	0.45	0.248024	0.248024	2.88065	10.9162	1	1	-1	-1	-1	-1	-1	-1	0	-1	0	0	1	1	-1			0	-1	-1	0	0	-1	-1	-1		-1	0	-1	-1	-1	0	0	-1	-1	-1	1
TCGA-95-7567-01	LUAD	15	13	2	1	0.265351	0.53	0.47	0.204649	0.204649	7.50432	24.412		1	0	0	-1		-1	-1		-1		-1	0	0	-1				1	0	0	0		0	-1		-1	-1	-1	-1	0	-1	-1
TCGA-95-7944-01	LUAD	13	11	2	0	0.464105	0.41	0.59	0.125895	0.125895	2.19011	5.71203		0	0		-1	-1	-1	-1	0	-1	0	-1	1		-1	-1	0	0	0	-1	0	0	0	0		-1	0	0	0	-1	0	1	0	0	0	0	0
TCGA-95-7947-01	LUAD	11	4	7	0	0.211269	0.66	0.34	0.128731	0.128731	4.51526	13.785	0	1	0	0	-1	1	0		1		0	0		1	-1	0	1	1	0	0	0	0				0	0	1		-1	0		-1	0	0	0
TCGA-95-7948-01	LUAD	17	14	3	1	0.112548	0.71	0.29	0.177452	0.177452	0.783057	4.03575		0	0		-1	-1	0	0	1	-1	1	-1	0	0		1		-1	0	-1		0	-1	-1	-1	-1	0	0	0	-1		-1		-1	-1	0	0
TCGA-95-8039-01	LUAD	9	8	1	0	0.293874	0.47	0.53	0.236126	0.236126	0.841935	2.4356	0	1	0	0	-1	0	0	0		0	0	0		0	-1	0		0	0	0	-1	-1	0	0	-1	0	0	0	0	-1		-1	-1	0	0	0	0
TCGA-95-8494-01	LUAD	21	16	5	1	0.214786	0.53	0.47	0.255214	0.255214	1.03464	2.35667		0	0	0	-1	0	0	0	1	1	-1	-1	1	1	-1		-1	-1	-1	0	-1			0	-1		-1		-1	-1	1	-1	-1	0	-1	0	0
TCGA-95-A4VK-01	LUAD	7	4	3	0	0.306294	0.57	0.43	0.123706	0.123706	1.80094	6.20323	0	1	1	0	0		0	0	0		0	0	0	0	-1	0	-1	0	0	0	0	0	0	0	0	0	0	1	0	-1		0	0	-1		0
TCGA-95-A4VN-01	LUAD	27	12	15	1	0.454917	0.18	0.82	0.365083	0.365083	3.24295	11.3788	-1	1	1	1	1	1		-1	1	1		-1	1	1	-1	1	1	1	1	0	0			1	-1	-1	-1	-1	-1		1	-1				-1	-1
TCGA-95-A4VP-01	LUAD	21	16	5	1	0.407342	0.3	0.7	0.292658	0.292658	1.07166	3.07015	-1	1	0		-1	-1		-1	0			-1	-1	-1	1	1	-1	-1	1	0		0	1	0	-1		-1	0	0	-1	-1	0	0	-1	0	0	0
TCGA-97-7546-01	LUAD	6	5	1	0	0.277076	0.67	0.33	0.0529243	0.0529243	2.13661	7.05375	0	0	0	0	-1	-1	0	0	0	0	0	0	0	0	-1	-1	0	0	0	0	0	0	0	0			0	1	-1	0	0	0		0	0	0	0
TCGA-97-7547-01	LUAD	17	6	11	1	0.209713	0.55	0.45	0.240287	0.240287	1.72429	4.50736	0	1	1	1	0	0	0	0	1	1	-1	-1	0	0	1	1	0	0	0	0	0	0	-1	-1	1	-1	0	1	1	0	0	1		0	0	0	0
TCGA-97-7552-01	LUAD	3	3	0	0	0.485473	0.18	0.82	0.334527	0.334527	0.510206	0.84034	0	0	0	0	0	0	0	0	0	0	0	0	0	0	0	0		0	0	0	0	0	0	0	0	0	0	0	0	0	0	-1	-1	0	0	0	0
TCGA-97-7553-01	LUAD	15	0	15	0	0.412698	0.29	0.71	0.297302	0.297302	0.363145	1.0615	1	1	0	0	0		0	0	1	0	1	0	1	1	1	1	0	0	1	1	0	1	0	0	0	0	0	0		0	1	0	0	0	0	1	1
TCGA-97-7554-01	LUAD	27	13	14	2	0.266182	0.29	0.71	0.443818	0.443818	3.53005	11.2962		1	1		-1	-1	-1	-1	1			-1	1	1	-1	0	1	0	1	1		0		-1	-1	1			-1	-1	1	1	1	1	1	-1	-1
TCGA-97-7937-01	LUAD	26	17	9	1	0.187472	0.59	0.41	0.222528	0.222528	3.40126	13.605	-1	1	-1	0	-1	-1	0	-1	1	-1	-1	-1	1	1	-1		-1	-1	1		1	1	0		0	-1	-1	0		-1	0		-1		0	1	1
TCGA-97-7938-01	LUAD	7	3	4	0	0.218783	0.61	0.39	0.171217	0.171217	3.17585	10.6796	0	1	0	0	0	0	0	0	1	0	1	-1	0	0	-1	1		0	0	0	0	0		0		0	0	0	0	-1	0	0	0	0	0	0	0
TCGA-97-7941-01	LUAD	2	2	0	0	0.227724	0.36	0.64	0.412276	0.412276	0.735093	2.35842	0	0	0	0	0	0	0	0	0	0	0	0	0	0	0	0	0	0	0	0	0	0	0	0	0	0	0	0	0	0	0	-1	-1	0	0	0	0
TCGA-97-8171-01	LUAD	6	3	3	0	0.0308607	0.82	0.18	0.149139	0.149139	0.447418	1.34225	0		0	0	0	0	0	0		0	1	0	1	1			0	0	0	0	0	0	0	0	0		0	0	-1	0	0	0	0	-1	-1	0	0
TCGA-97-8172-01	LUAD	13	8	5	1	0.335549	0.32	0.68	0.344451	0.344451	2.0304	7.13625	-1	1	-1	-1	0	-1	0	0	1	-1	0	0	0	0	1	1	0	0	0	0	0	0	0	0	0	0	-1	0	0	0	0	0	0	-1	1	0	-1
TCGA-97-8174-01	LUAD	20	15	5	1	0.271938	0.3	0.7	0.428062	0.428062	1.26461	4.41142		1		0	-1	-1	0	0	1	1		-1	-1	-1	0	0	-1	-1	0	0	-1	-1	0	0	-1	-1		0		0	0	-1	-1	-1		1	-1
TCGA-97-8175-01	LUAD	8	2	6	0	0.358448	0.43	0.57	0.211552	0.211552	0.230962	0.721755	0	0	0	0	0	0	0	0	0	0	0	0	1	1	0	0		0	0	-1	0	0	0	0	0	0	0	0		-1	1	1	1	1		0	0
TCGA-97-8176-01	LUAD	8	7	1	0	0.30361	0.53	0.47	0.16639	0.16639	1.31724	3.57944		1	0	0		0	0	0	0	0	0	-1	0	0	0	0	-1	0	0	0	0	0	0	0	0	-1	0	0	0	0	0	-1	-1	-1	-1	0	0
TCGA-97-8177-01	LUAD	19	9	10	1	0.395711	0.25	0.75	0.354289	0.354289	0.339002	0.819256		1	0		-1	-1	0	0	0	0	1		1		0	0	-1	-1	0	0	1	1	-1	0		-1	-1	1	1	0	1	1	-1	0	0	-1	1
TCGA-97-8179-01	LUAD	30	18	12	1	0.116845	0.48	0.52	0.403155	0.403155	1.1527	4.13284	-1	1	0	0	-1	-1	1	-1	1	-1	1	-1	1	1	-1	1	-1	-1	0	0	-1	-1	-1	-1	-1	0	-1	1	1	0	0	1	-1	-1	0	1	1
TCGA-97-8547-01	LUAD	10	7	3	0	0.24642	0.48	0.52	0.27358	0.27358	0.521028	1.4473		0	0	0	0	0			1		0	-1	1	0	-1		-1	-1	0		0	0	0	0	-1	0	0	0	0	-1	1	0	-1	0		0
TCGA-97-8552-01	LUAD	21	16	5	2	0.248435	0.27	0.73	0.481565	0.481565	0.171798	0.572659		0	-1	-1	-1	-1	0	0	1	1	-1	-1	1	1	0	0	-1	-1	-1	-1	-1	-1	0		-1	-1	0	1		0	0	0		-1	-1
TCGA-97-A4LX-01	LUAD	14	12	2	0	0.552084	0.2	0.8	0.247916	0.247916	1.44496	4.16148	0	0	0		-1	1	0	0	0	0	0	-1	0	0		1	0	0	0	-1		0	0	0	-1	0	-1	0	0	-1		-1	-1	-1	-1	-1	-1
TCGA-97-A4M0-01	LUAD	16	12	4	1	0.215143	0.55	0.45	0.234857	0.234857	3.26013	10.1657	0	1	0	0	-1	0		0	1	1	-1	-1	0	0	-1		-1	0	0	0	0	0	0	0	-1	-1		0			0	-1	-1	0	0	-1	-1
TCGA-97-A4M1-01	LUAD	20	12	8	1	0.173137	0.36	0.64	0.466863	0.466863	0.315078	1.08845	1	1	0	0	-1	-1	-1	-1		0	1	1	1	-1	0	0	-1		-1	-1		0	-1	-1	-1	0	-1		0			0	0	0	0	1	1
TCGA-97-A4M2-01	LUAD	1	0	1	0	0.436969	0.37	0.63	0.193031	0.193031	0.177768	0.681444	0	0	0	0	0	0	0	0	0	0	1	0	0	0	0		0	0	0	0	0	0	0	0	0	0	0	0	0	0	0	0	0	0	0	0	0
TCGA-97-A4M3-01	LUAD	5	3	2	0	0.130271	0.69	0.31	0.179729	0.179729	1.06378	5.43389	0	1		1	0		0	0	0	0	0	-1	0	0	-1	0	0	0	0	0	0			0	0	0		0		0	0	0	0		0	0	0
TCGA-97-A4M5-01	LUAD	6	5	1	0	0.30154	0.25	0.75	0.44846	0.44846	1.04283	3.72038		1	0	0	-1	-1	0		0	0		-1	0	-1	0	0		0	0	0	0		0	0	0	0	0	0	0	-1		0	0	0	0	0	0
TCGA-97-A4M6-01	LUAD	9	8	1	0	0.363205	0.43	0.57	0.206795	0.206795	0.38355	0.796603		1	0	0	-1	-1	0	0		0	0	0	0	-1	0	0	-1	-1	0	0	0	0				0	0	0	0		0	0	-1	-1	-1	0	0
TCGA-97-A4M7-01	LUAD	9	3	6	0	0.409631	0.37	0.63	0.220369	0.220369	2.5726	7.71781	0	1	0	0	0	1	0	0	1		0		1		-1	0	-1	-1	0		0	0	0	0	0	0		1	1	0	0	0	0	0	0	0	0
TCGA-99-7458-01	LUAD	13	11	2	0	0.329517	0.36	0.64	0.310483	0.310483	3.66947	11.9041	1	1	0	0	0	0	0	0		0	0		0	0	-1	0	0	0	0	0	0	0	-1	-1	-1	0	-1	0	0	-1	0	0	0	-1	-1	-1	-1
TCGA-99-8025-01	LUAD	20	10	10	2	0.199753	0.43	0.57	0.370247	0.370247	3.5399	12.5533	0	1	1	1	0	0	-1	-1	1	-1		-1	1	1		1		0	1		0		-1	-1	-1	-1		1	-1	-1	1	0	0			0
TCGA-99-8028-01	LUAD	3	1	2	0	0.512027	0.18	0.82	0.307974	0.307974	3.38981	10.6954	0	0	0	0	0	0	0	0	1	1	0			0	0			0	0	0	0	0		0	0	0	-1	0	0	0	0	0	0	0	0	0	0
TCGA-99-8032-01	LUAD	18	14	4	1	0.312386	0.31	0.69	0.377614	0.377614	3.04732	10.337	-1	1	0	0	0	0	0		0	0	-1	-1	0	0	-1	1	-1		0	0	0	0	1	1	-1			-1	-1	0	0	-1	-1	-1	-1	0	0
TCGA-99-8033-01	LUAD	21	12	9	1	0.402545	0.29	0.71	0.307455	0.307455	1.43426	4.85206	0	1	0	0	-1	0	-1	-1	1		1	-1	1			1	-1	-1		0			1	1	-1	-1	0	1	1	-1		0				-1	-1
TCGA-99-AA5R-01	LUAD	0	0	0	0	0.415893	0.96	0.04	-0.375893	0	0.390856	1.29283	0	0	0	0	0	0	0	0	0	0	0	0	0	0	0	0	0	0	0	0	0	0	0	0	0	0	0	0	0	0	0	0	0	0	0	0	0
TCGA-J2-8192-01	LUAD	16	14	2	1	0.318307	0.41	0.59	0.271693	0.271693	0.586242	1.81735		0	0	0	-1	-1	0	0		0	-1	-1	1	0	-1		-1	-1	0	0	0	0	0		-1	1	-1		0	-1	0	-1	-1	-1	-1		0
TCGA-J2-8194-01	LUAD	15	6	9	1	0.250183	0.44	0.56	0.309817	0.309817	1.01836	4.04349	0	1	1	1	1	-1		0	0	0	1	-1	1	0	-1	1	0	0	1	1	0	0	0	0	-1	0	0	0	0	0	0	-1	-1	0	0	0	0
TCGA-J2-A4AD-01	LUAD	8	7	1	0	0.231672	0.57	0.43	0.198328	0.198328	2.5845	8.16466	0	0	0	0	0	0	0	0	1	-1	0	0	0		0		-1	-1	0	0	0		0	0	-1			0	0	-1	0	0	0	-1	-1	0	0
TCGA-J2-A4AE-01	LUAD	7	2	5	0	0.254953	0.52	0.48	0.225047	0.225047	0.547354	1.18593	0	0	0	0	0	0	0	0	1	1	1	1	1	0	-1		0	0	0	0	0	0	0	0		0	0	0	0	-1	0	0	0	0	0	0
TCGA-J2-A4AG-01	LUAD	4	3	1	0	0.479429	0.31	0.69	0.210571	0.210571	0.819744	2.27707	0	0	0	0	0	0	0	0	0	0	0	0	0	0	0	0	0	0	0	0	0	0	0	0	0	-1	0	1	-1	0	0			0	0	0	0
TCGA-L4-A4E5-01	LUAD	17	14	3	0	0.228805	0.66	0.34	0.111195	0.111195	2.73848	8.51636	0	0	0		-1	0		-1	1		0	-1	1	1	-1		0	0	0	0	-1	0	0	0	-1		-1	-1	-1	-1	0			-1	-1	-1
TCGA-L9-A443-01	LUAD	22	16	6	1	0.163678	0.48	0.52	0.356322	0.356322	1.49596	6.67196	-1	1	1		0	0	-1	-1	0	-1	-1	-1	1	-1	-1	1	0	-1	0		0		0	0	-1	0		0	-1		1	1	-1	-1	0	0	-1
TCGA-L9-A444-01	LUAD	30	21	9	1	0.412882	0.37	0.63	0.217118	0.217118	4.6004	13.7711		0	1	-1	0	0			1	-1	1	-1	1	0	-1	1	1	-1	1	-1	-1	-1	-1	-1	-1		-1	-1	-1	-1		1	-1	-1	-1	-1	-1
TCGA-L9-A50W-01	LUAD	10	7	3	0	0.154588	0.76	0.24	0.085412	0.085412	0.124472	0.964656		0	0	0	-1	0	0	0	0		0	-1	1	1	-1	1	-1	0	0	0	0	0	0	0	0	0	0	0	0	-1	0	-1	-1	0	0	0	0
TCGA-L9-A5IP-01	LUAD	26	21	5	1	0.296086	0.53	0.47	0.173914	0.173914	2.60762	7.8539	-1	1	0		-1	-1		-1	1	-1	-1	-1	1		-1	1	-1	0	-1	-1	-1	0		0	-1	-1	0	0	0	-1	-1	-1	-1	-1	0	1
TCGA-L9-A743-01	LUAD	16	7	9	2	0.50433	0.09	0.91	0.40567	0.40567	1.04012	3.05733		1	1			0	0	1	1	0		1	1			1	-1							0	-1		0	0	-1	-1	1	0	-1	-1		1	0
TCGA-L9-A7SV-01	LUAD	19	13	6	1	0.0874234	0.83	0.17	0.0825765	0.0825765	14.6205	42.7272	0	1		0	-1	0	-1		1	-1		-1	1		-1		-1	0	1		-1		-1	0	-1		-1		-1	0	1	-1	1	-1	0	0
TCGA-L9-A8F4-01	LUAD	23	14	9	1	0.462728	0.32	0.68	0.217272	0.217272	6.19398	20.0465		1	0			1	-1	-1	1		0	0	1		-1	1	-1	-1	0	0	-1	0			-1	0	-1		1	-1	-1	-1	-1	-1	1	1	1
TCGA-MN-A4N1-01	LUAD	23	18	5	2	0.158387	0.48	0.52	0.361613	0.361613	3.45033	11.5206		1	0	1	-1	-1	0		1	-1		-1	1		-1		-1	-1	1	-1	-1	-1				-1	-1	-1	-1	-1			-1	-1		-1	0
TCGA-MN-A4N4-01	LUAD	19	9	10	2	0.279447	0.34	0.66	0.380553	0.380553	10.9222	37.4021		1	0	0	-1	0			1	-1	1	-1	1		-1		-1		1			0	1	0			-1	1	1	-1	0	1	-1			0	1
TCGA-MN-A4N5-01	LUAD	19	7	12	1	0.283358	0.38	0.62	0.336642	0.336642	3.07219	11.2264	0	1	1	1	0	0	1		1	0	1	-1	1	0	-1	1	-1	1				-1		-1	0	0	0			-1	1					1
TCGA-MP-A4SV-01	LUAD	21	9	12	1	0.383987	0.36	0.64	0.256013	0.256013	2.81473	8.47383	0	1	0	1		1		1			1		1	1	-1	1		0	0	0	0	1		1	-1		-1	0		-1	1	0	0	-1	-1	-1	1
TCGA-MP-A4SW-01	LUAD	7	3	4	0	0.389075	0.46	0.54	0.150925	0.150925	0.665051	1.59034		0	0	0		0	1	0	1		0		0	0	-1	1	-1		0	0	0	0	0	0		0	-1	1	0	0	0			0
TCGA-MP-A4SY-01	LUAD	9	3	6	0	0.278688	0.35	0.65	0.371312	0.371312	1.03715	4.29266	0	1	0	0	0	0	0	0	1		0	-1	0	0	1	1	0	-1	0	0	0	0	0	0	-1	0	0	0	0	0	0	0	0	0	0	1	1
TCGA-MP-A4T2-01	LUAD	19	11	8	2	0.229217	0.48	0.52	0.290783	0.290783	0.737098	2.09336	0	0	0	0		0	0	0	1	1	-1	-1	1	1	1	1	0	0	-1	-1	-1	-1	0	0	-1	0	-1	0	0	0	0	-1	-1	0		1	1
TCGA-MP-A4T7-01	LUAD	19	6	13	1	0.263226	0.34	0.66	0.396774	0.396774	0.790935	3.54456	-1	1	0	0	0	0	0	0	1		0	0	0	0	-1		-1	-1	1	1	0	0	1	1	1	-1	1			0	0	0		-1	1	1	1
TCGA-MP-A4T8-01	LUAD	13	8	5	1	0.169011	0.59	0.41	0.240989	0.240989	0.865095	3.07258	0	1				-1	0	0	1	-1	0	0		1	0		0	0	1	1	-1		0	0			-1	0		-1	0	0	0	-1	-1	-1	0
TCGA-MP-A4T9-01	LUAD	10	5	5	0	0.384136	0.18	0.82	0.435864	0.435864	0.40521	0.752533	0	0		1	-1	0	0	0		0	0	0	1		-1		-1	0	-1	0	-1				0	1	0	0	0	1	1	0	0	0	0	0	0
TCGA-MP-A4TA-01	LUAD	11	11	0	0	0.577713	0.33	0.67	0.0922872	0.0922872	3.00825	8.58664	0	0	0		-1		0		0		0	-1	0	0	-1	0	-1	-1	0	0	0	0		0	-1	0			0	-1	0	0		-1	-1	-1
TCGA-MP-A4TC-01	LUAD	12	0	12	0	0.370633	0.45	0.55	0.179367	0.179367	2.0209	6.29366		1	1	1	0	0	1	1	1	0	0	0	1	1	0	1	1	1	0	0	0	1	0	0	0	0	0	0	0	0	0	0	0	0		0	0
TCGA-MP-A4TE-01	LUAD	18	8	10	1	0.204612	0.68	0.32	0.115388	0.115388	1.03348	3.53106	-1	1	0	0	0	0	0	0	0	-1	0	-1	0	0	1	1		-1	1	0	0	0	1	1		1	-1	0	0	-1	1	0	0	0	0	1	1
TCGA-MP-A4TF-01	LUAD	28	17	11	2	0.360278	0.29	0.71	0.349722	0.349722	3.28734	10.6475			1	0	-1		1	-1	1	1	1	-1	1	1	-1	1	-1	-1		-1	-1				-1	1	-1	-1		-1	0	-1	-1	-1	0	1	1
TCGA-MP-A4TH-01	LUAD	6	1	5	0	0.394304	0.4	0.6	0.205696	0.205696	0.653027	3.02767		1	0	0	0	0	0	0	1	1	0	0	0	0		1	0	0	0	0	0	0		0	0	0	0	0	0		0	0		-1	1	0
TCGA-MP-A4TI-01	LUAD	8	5	3	0	0.508272	0.22	0.78	0.271728	0.271728	2.48871	5.60674	0	0	0	0	0	0		1			0	0					0	0	0	0	0	0	1	1	0	0	-1	0	0	-1	0	-1	-1	0	0	-1
TCGA-MP-A4TK-01	LUAD	18	17	1	1	0.334534	0.34	0.66	0.325466	0.325466	2.65748	8.63681		0		-1	-1			0		-1	0	-1	1		-1		-1	0	-1	-1				-1	-1		-1	-1	0		0		-1	-1	-1	-1
TCGA-MP-A5C7-01	LUAD	6	3	3	0	0.067335	0.87	0.13	0.062665	0.062665	0.830729	1.57552		1	0	0	0	0	0	0	0	-1	1	-1	0	0	0	0	0	0		1	0	0	0	0	0	0	0	0	0	0	0	0	0		-1	0	0
TCGA-NJ-A4YF-01	LUAD	18	11	7	1	0.232181	0.55	0.45	0.217819	0.217819	4.23446	15.3247	0			0	-1	1	1	-1	1		0	-1	1		-1	1		-1	1	-1					-1		0	-1		-1	0			-1		-1	1
TCGA-NJ-A4YG-01	LUAD	8	0	8	0	0.338028	0.32	0.68	0.341972	0.341972	1.05803	3.63161	0	1	0	0	0	0	0	0	1	1	1	0	0	0	1	1	0	0	0		0	0	0	0	1	0	0	1	0	0	0	0	0	0	0	0	0
TCGA-NJ-A4YI-01	LUAD	18	16	2	1	0.175491	0.58	0.42	0.244509	0.244509	3.60431	11.1013		1	0	0	0	0	-1	-1	0	0	-1	-1		0	-1	-1	0	-1	-1	-1	0	0	-1		-1	0	-1	1	-1	-1		0	0	0	0	-1	0
TCGA-NJ-A4YP-01	LUAD	8	2	6	1	0.327973	0.23	0.77	0.442027	0.442027	4.47998	13.0642	0	1	0	0	0	0	0	0	0	0	1	-1	0	0	0	0	0	0	0	0	0	0	0	0	0	0	1	1	-1	0	0	0	0	0	0	1	1
TCGA-NJ-A4YQ-01	LUAD	15	13	2	0	0.534274	0.29	0.71	0.175726	0.175726	8.30154	27.9446		1	0	0	-1	0	0		0	0			0	0	-1	0	-1	-1	1	-1	-1	0	-1	0	-1			0		-1		0	0	-1	-1		0
TCGA-NJ-A55A-01	LUAD	1	0	1	0	0.368777	0.21	0.79	0.421223	0.421223	0.900181	2.67054	0	1	0	0	0	0	0	0	0	0	0	0	0	0	0	0	0	0	0	0	0	0	0	0	0	0	0	0	0	0	0	0	0	0	0	0	0
TCGA-NJ-A55R-01	LUAD	21	20	1	1	0.345369	0.23	0.77	0.424631	0.424631	2.07097	6.4966	-1	1	-1	-1	-1	-1	0	0	0	0	0	-1	-1	-1		0	0	-1	-1	-1	-1		0	0	-1	0	-1		0	-1	-1	0	0	-1	-1	0	0
TCGA-NJ-A7XG-01	LUAD	16	13	3	1	0.122267	0.62	0.38	0.257733	0.257733	0.572987	0.85948	-1	1	0	0	-1	-1	0	0	1	1	0		0	0	0		-1	-1	0	0	0	0	0	-1	-1	-1	-1			0	0	0	0	-1	-1	0	0
TCGA-O1-A52J-01	LUAD	29	13	16	1	0.283192	0.5	0.5	0.216808	0.216808	1.35859	4.27813	0	1	1	1			-1	0	1	1		1	1	1	-1	-1	-1	-1	-1	0	1	1	-1		-1	1	0	1	1	-1	1			-1	-1	-1	1
TCGA-S2-AA1A-01	LUAD	16	0	16	0	0.419555	0.32	0.68	0.260445	0.260445	0.98927	3.06056	0	1	0	0	0	1	0	0	1	0	0	0	1	1	0	0	1	0	0	0	1	1	1		0	0	0	1	1	0	0	1	1	0	0	1	1
[truncated: 19 more columns]
