# Supplementary material for: Integrated bulk and single-cell RNA sequencing identifies an aneuploidy-based gene signature to predict sensitivity of lung adenocarcinoma to traditional chemotherapy drugs and patients’ prognosis
Source: PeerJ journal article supplement (doi:10.7717/peerj.17545), 2024-06-24
Supplement: TableS3.xlsx [file TableS3.xlsx]

## Sheet: tcga.cox.excel
Supplementary table 3. Identification of DGEs related to prognosis via univariate Cox analysis.
Name	p.value	HR	Low 95%CI	High 95%CI	coef
UBE2T	0.00108325	1.24888	1.09303	1.42695	0.222249
TOP2A	0.00275908	1.1746	1.05713	1.30513	0.16093
TEDC2	0.00141254	1.28626	1.10205	1.50127	0.251742
CDC20	0.000257839	1.22668	1.09937	1.36875	0.204315
IQGAP3	0.00590183	1.19206	1.05192	1.35087	0.175681
SAPCD2	0.000859807	1.24362	1.09396	1.41374	0.218024
KIF20A	1.62724e-05	1.35069	1.17813	1.54851	0.300612
CCNB1	5.07751e-06	1.36054	1.19195	1.55297	0.307882
CDCA8	0.00101306	1.23785	1.08996	1.40582	0.213379
UBE2C	0.00061354	1.18164	1.07402	1.30004	0.166901
PLK1	2.49935e-06	1.35676	1.19493	1.54051	0.305102
ZWINT	0.000661667	1.26259	1.10401	1.44395	0.233168
BIRC5	0.000249833	1.23137	1.10158	1.37645	0.208127
SPAG5	0.000812563	1.23904	1.09295	1.40466	0.214337
KIF2C	0.000351466	1.23307	1.09924	1.38319	0.209506
CCNB2	9.5736e-05	1.28263	1.13185	1.45349	0.248913
NEK2	2.64969e-05	1.28555	1.14341	1.44536	0.251185
TPX2	2.25504e-05	1.25472	1.12972	1.39355	0.226915
NUSAP1	0.00031743	1.27405	1.11668	1.45359	0.242198
PPAT	0.00538465	1.29987	1.08065	1.56355	0.262262
CEP55	0.000141367	1.26586	1.12113	1.42926	0.235749
UHRF1	0.000536998	1.27304	1.1104	1.45949	0.241404
KIF4A	3.25077e-05	1.28504	1.14167	1.44641	0.250788
RRM2	8.1743e-06	1.30666	1.16177	1.46962	0.267475
HJURP	1.26403e-05	1.29844	1.1548	1.45994	0.261162
AURKB	0.00175756	1.19358	1.06833	1.33352	0.176959
PSMG3	0.00894008	1.30569	1.06904	1.59472	0.266729
MYBL2	0.00230607	1.15035	1.05126	1.25877	0.140062
BUB1B	0.000261956	1.26037	1.11311	1.42711	0.231404
DLGAP5	4.3016e-06	1.32152	1.1734	1.48835	0.278786
ANLN	2.2732e-07	1.33446	1.19634	1.48854	0.28853
CDC6	0.000426731	1.24161	1.10077	1.40047	0.216412
NUF2	0.00275568	1.19544	1.06358	1.34365	0.178517
ASF1B	0.00164074	1.25704	1.0902	1.44942	0.228761
TK1	2.36012e-05	1.32464	1.16277	1.50904	0.281139
MELK	0.000454515	1.22272	1.09273	1.36817	0.201076
KIF11	0.000142166	1.29573	1.13383	1.48074	0.259071
CENPF	0.000320268	1.2367	1.10156	1.38842	0.21245
CDC25C	7.04072e-06	1.40823	1.21286	1.63506	0.34233
FOXM1	4.516e-05	1.2554	1.12544	1.40037	0.227452
TROAP	0.00405153	1.17596	1.05291	1.3134	0.162088
GINS2	0.00706923	1.20014	1.05094	1.37052	0.18244
SKA3	5.42507e-05	1.33377	1.1597	1.53396	0.288006
HMMR	2.86677e-06	1.36851	1.20002	1.56065	0.313722
CDC45	0.00139975	1.21246	1.0773	1.36458	0.192655
CCNA2	1.36246e-05	1.30681	1.15837	1.47426	0.267586
SPC24	0.00102795	1.25933	1.09737	1.44519	0.230578
GTSE1	0.000148643	1.29095	1.13137	1.47304	0.255377
PRC1	1.09905e-05	1.35562	1.18368	1.55253	0.304256
CDCA3	0.000351758	1.29147	1.12244	1.48596	0.255784
CDCA5	5.87337e-05	1.28581	1.13742	1.45357	0.251392
MCM4	0.000340623	1.29185	1.12296	1.48614	0.256075
NCAPH	0.000664584	1.23287	1.09286	1.39081	0.209342
PKMYT1	0.000137444	1.31325	1.14159	1.51073	0.272507
MKI67	0.000202049	1.24811	1.11043	1.40287	0.221634
CDT1	0.000271972	1.27094	1.11704	1.44605	0.239761
KIF18B	0.00448605	1.17826	1.05222	1.3194	0.16404
EXO1	4.53423e-06	1.33816	1.18149	1.51559	0.291293
NDC80	5.26207e-05	1.28933	1.13991	1.45833	0.254122
DEPDC1B	7.68147e-05	1.29301	1.13837	1.46865	0.256969
CENPA	0.000618818	1.22043	1.08888	1.36788	0.199206
CHAF1B	0.00141319	1.32095	1.11342	1.56717	0.278354
KIFC1	0.00110108	1.2137	1.08042	1.36342	0.193673
ASPM	6.05385e-05	1.28621	1.13735	1.45455	0.251699
NCAPG	0.000105213	1.26895	1.12504	1.43128	0.238193
AURKA	0.000176044	1.28125	1.12563	1.45839	0.247835
ERCC6L	0.000753058	1.32502	1.12494	1.56069	0.281429
POLE2	0.00727403	1.23519	1.05864	1.44118	0.211222
CDKN3	1.06226e-05	1.31541	1.16433	1.4861	0.274151
CKAP2L	4.5873e-05	1.32011	1.15508	1.50873	0.277716
KIF14	2.514e-05	1.32925	1.16442	1.51741	0.284616
KPNA2	5.4363e-05	1.35807	1.17051	1.5757	0.306068
ORC1	0.00109244	1.25854	1.0963	1.4448	0.229953
DEPDC1	0.000198801	1.26657	1.11832	1.43448	0.236313
SGO1	0.000159074	1.33061	1.14728	1.54324	0.28564
BUB1	0.000636972	1.24435	1.09764	1.41068	0.218614
LMNB1	0.000891083	1.2825	1.10744	1.48524	0.248813
TTK	0.00114054	1.228	1.08508	1.38975	0.205388
TIMELESS	0.00899326	1.23503	1.05413	1.44697	0.211093
MCM10	0.00133239	1.2302	1.08398	1.39615	0.207178
CDK1	6.74841e-05	1.28522	1.136	1.45404	0.25093
FEN1	0.000158743	1.39983	1.17564	1.66677	0.33635
SHCBP1	6.24342e-05	1.35381	1.16721	1.57023	0.302922
PIMREG	0.000286058	1.25162	1.10869	1.41297	0.224435
SPC25	2.28672e-05	1.36228	1.18066	1.57183	0.30916
DTYMK	0.000465568	1.44256	1.17494	1.77113	0.366417
TYMS	9.57925e-05	1.32332	1.14958	1.52333	0.280145
CHEK1	0.000117282	1.33195	1.15118	1.5411	0.286641
KIF15	0.00931537	1.21285	1.04866	1.40274	0.192971
SKA1	0.000316276	1.26453	1.11291	1.4368	0.234699
ESPL1	0.00104766	1.24227	1.09112	1.41436	0.216939
RFC4	0.00423807	1.25088	1.07298	1.45828	0.223849
CKS1B	9.19838e-05	1.34738	1.16036	1.56453	0.298159
TACC3	8.76582e-05	1.38799	1.17825	1.63506	0.327857
MCM2	0.00636698	1.20601	1.05416	1.37972	0.187314
KIF23	0.000126374	1.28126	1.12876	1.45435	0.247841
TRIP13	0.00799702	1.17695	1.04344	1.32754	0.162927
POC1A	0.00184289	1.30208	1.10279	1.53738	0.263963
CENPI	0.00551221	1.23842	1.06485	1.44028	0.213833
MIS18A	0.00276579	1.34107	1.10657	1.62526	0.293467
FAM83D	0.000595816	1.23764	1.09582	1.39781	0.213203
CDC25A	0.000395982	1.32079	1.13236	1.54057	0.278228
ATAD2	0.00345215	1.23595	1.07236	1.42449	0.211837
NCAPG2	0.00274902	1.26531	1.08469	1.476	0.235317
CCT5	0.00300236	1.33195	1.10222	1.60958	0.286647
MCM6	0.00227298	1.30084	1.09868	1.54019	0.263008
PLK4	0.00206861	1.27176	1.09137	1.48197	0.240401
PARPBP	0.00760457	1.2435	1.05961	1.4593	0.217929
CENPE	0.000325923	1.30156	1.12729	1.50276	0.263561
TICRR	0.000318259	1.36263	1.15138	1.61265	0.309418
CDCA4	0.000162922	1.41336	1.18072	1.69182	0.345967
RAD51AP1	0.00600819	1.20217	1.05419	1.37093	0.184131
CLSPN	0.00208547	1.23239	1.07884	1.40779	0.208954
WDHD1	0.000182275	1.34277	1.15071	1.56689	0.294733
PRR11	0.000252807	1.26483	1.11528	1.43443	0.234937
WDR62	0.0051399	1.23749	1.06591	1.4367	0.213089
AUNIP	0.00222567	1.26376	1.08771	1.46831	0.23409
DSCC1	0.00137683	1.26105	1.09402	1.45358	0.231942
UBE2S	6.0786e-05	1.32622	1.15526	1.52247	0.28233
CIP2A	0.00531029	1.21857	1.06045	1.40028	0.197682
SGO2	0.000378827	1.35588	1.14634	1.60373	0.304454
RACGAP1	0.000574162	1.28735	1.11496	1.48639	0.252587
CDH24	0.00590074	1.22132	1.0593	1.40812	0.199931
CENPW	0.0058348	1.19455	1.05273	1.35547	0.177768
IGF2BP3	0.000559794	1.17236	1.0711	1.28319	0.15902
