# Supplementary figures and images for: Integrated bulk and single-cell RNA sequencing identifies an aneuploidy-based gene signature to predict sensitivity of lung adenocarcinoma to traditional chemotherapy drugs and patients’ prognosis
Source: PeerJ journal article supplement (doi:10.7717/peerj.17545), 2024-06-24

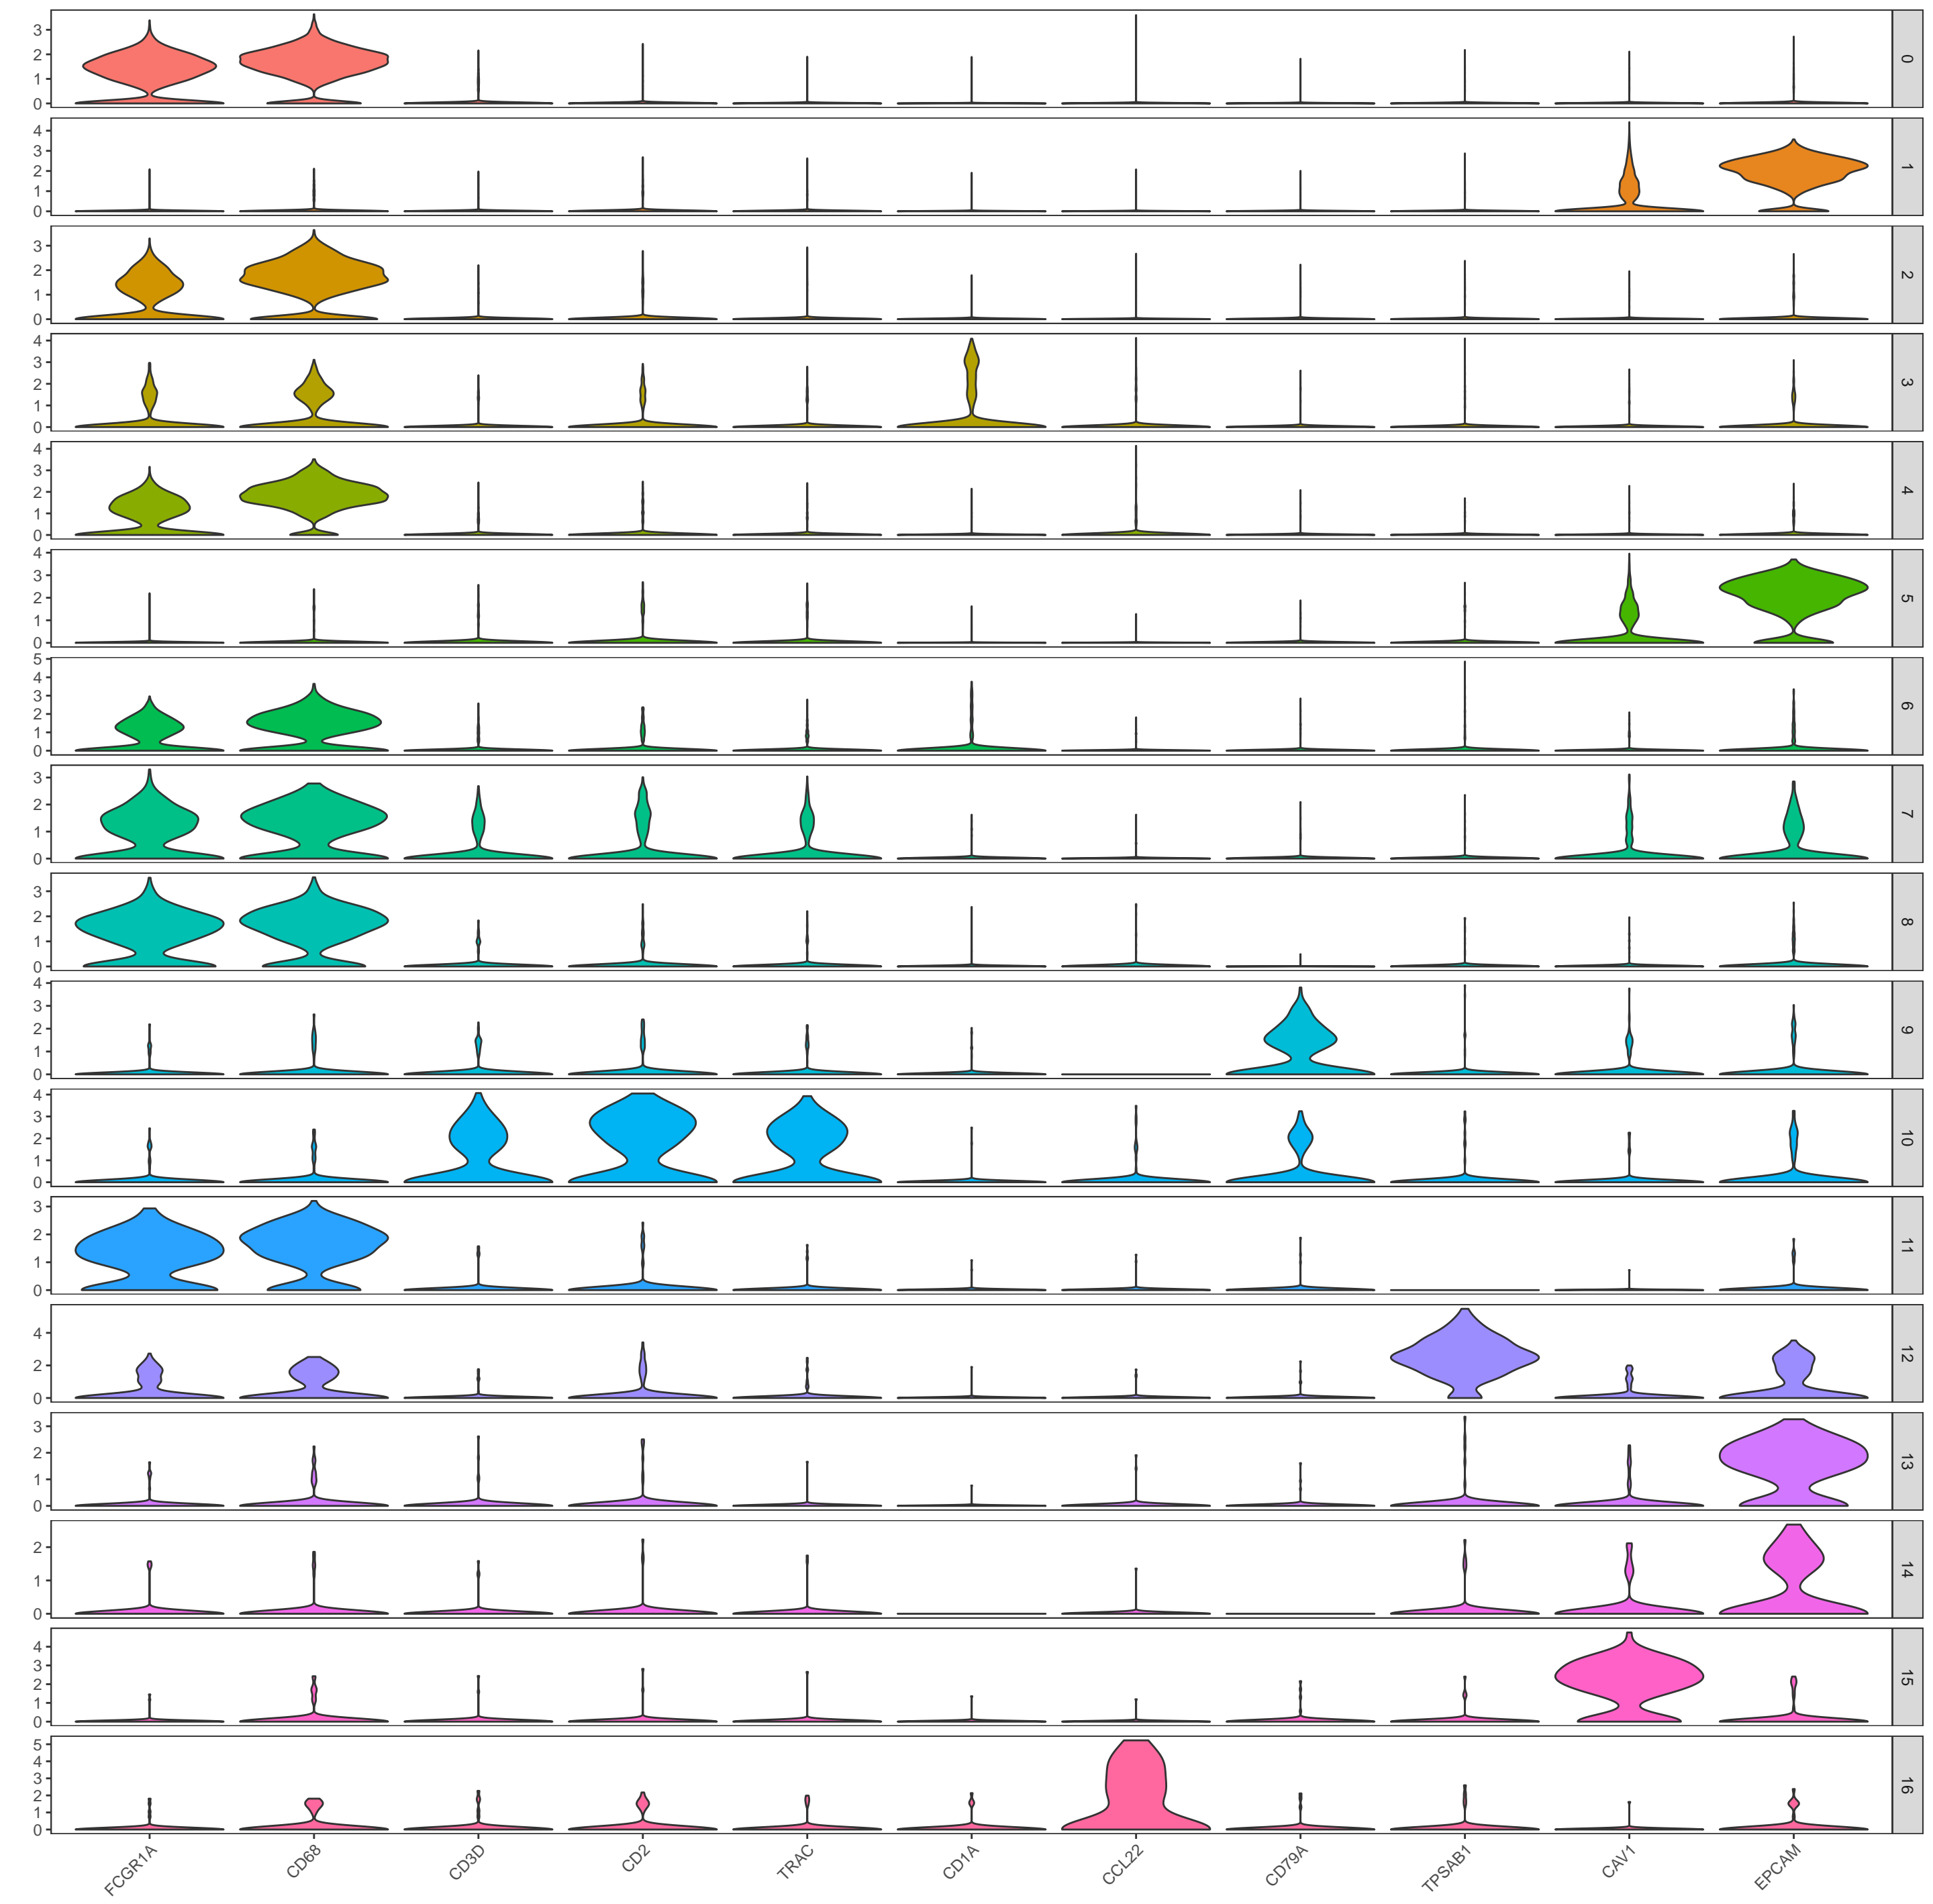

Supplement: FigureS2.pdf [file FigureS2.pdf]
